# Supplementary material for: Uniform multidrug therapy for leprosy patients in Brazil (U-MDT/CT-BR): Results of an open label, randomized and controlled clinical trial, among multibacillary patients
Source: PLoS Negl Trop Dis. 2017 Jul 13;11(7):e0005725. doi: 10.1371/journal.pntd.0005725 (PMC5526599; doi:10.1371/journal.pntd.0005725)
Supplement: S5 Data File With Codebook — (XLSX) [file pntd.0005725.s005.xlsx]

## Sheet: UMDT DATA
ID	SEX	DOB	AGE	TreatGroup	INICIAL aBI	DT FIRST VISIT	DT LAST VISIT	DISABILITY PROG	DT DisProg	REACTION	DT FIRST REACTION	No.Reactions AFTER 6 m	RELAPSE	RELAPSE DATE
AM0014	M	1973-08-15	36	1	4.5	39195	41406	0		1	2008-05-27	0	1	2011-04-02
AM0020	F	1970-10-24	40	1	4	39198	41093	1	2007-11-27	1	2009-06-21	0	0
AM0029	F	1987-11-08	20	0	2	39226	39559	0		0		0	0
AM0032	M	1960-01-21	48	0	3	39254	40337	0		0		0	0
AM0034	M	1952-07-31	58	1	2.5	39282	41518	0		1	2008-07-19	0	0
AM0042	M	1950-01-30	58	1	2.5	39300	41899	0		0		0	0
AM0047	M	1950-06-19	57	1	2	39317	40044	0		1	2008-06-17	0	0
AM0058	M	1984-05-17	23	1	2.75	39357	40806	1	2008-03-25	1	2008-06-17	0	0
AM0063	M	1967-09-17	40	1	0	39384	41562	0		0		0	0
AM0074	M	1952-10-08	55	1	2.75	39422	41617	0		1	2008-06-12	0	0
AM0075	M	1964-01-28	44	0	0	39429	39779	0		0		0	0
AM0076	M	1972-05-13	36	1	5	39469	39841	0		0		0	0
AM0078	M	1962-03-28	45	0	4.25	39478	41319	0		1	2010-09-03	0	0
AM0079	M	1969-07-31	38	1	5.5	39492	41309	1	2011-03-28	1	2009-02-02	0	0
AM0080	M	1981-06-16	26	0	1.25	39504	41086	0		0		0	0
AM0082	M	1951-11-19	56	0	0	39518	40954	0		1	2008-11-18	0	0
AM0084	M	1969-11-18	38	1	5.5	39532	39863	0		1	2008-07-14	0	0
AM0085	F	1982-04-18	26	0	3	39538	41210	0		0		0	0
AM0087	F	1987-04-21	21	0	2.25	39196	41626	0		1	2008-07-14	0	0
AM0088	M	1973-05-06	36	0	0	39567	40244	0		0		0	0
AM0095	M	1969-06-30	39	0	3.5	39602	41346	0		1	2010-04-24	0	0
AM0096	F	1981-08-16	28	1	0	39615	41773	0				0	0
AM0105	M	1984-02-25	24	1	0.75	39685	41197	0		1	2009-05-20	0	0
AM0112	M	1974-07-02	34	0	5.5	39735	41540	0		1	2011-04-14	0	0
AM0113	M	1958-03-25	50	0	1.25	39467	39930	1	2008-10-20	0		0	0
AM0114	M	1987-12-30	21	0	4	39755	41595	0		1	2010-11-30	0	0
AM0117	M	1972-12-05	36	1	0	39784	40682	0		0		0	0
AM0120	M	1986-01-26	22	1	0	39797	41771	1	2009-12-28	0		0	0
AM0122	M	1945-03-11	63	1	0	39797	41619	0		0		0	0
AM0125	F	1989-07-22	19	1	5	39839	41707	0		1	2009-10-22	0	0
AM0127	M	1995-08-09	13	1	3.75	39856	41682	0		1	2009-11-11	0	0
AM0128	M	1999-04-06	9	1	3.5	39860	40832	0		0		0	0
AM0130	M	1962-03-30	48	0	4	39862	41815	1	2013-05-27	1	2011-09-23	0	0
AM0134	M	1982-05-20	27	1	0	39898	41344	0		0		0	0
AM0137	M	1944-02-11	65	1	3.5	39945	40605	0		1	2011-02-03	0	0
AM0138	M	1985-12-28	23	0	3.25	39959	40301	0		1	2010-04-05	0	0
AM0140	M	1956-04-02	53	1	0	39994	41120	0		0		0	0
AM0143	F	1995-07-28	14	0	0	39959	41052	0		0		0	0
AM0147	M	1991-09-23	18	0	1.5	40056	41794	0		0		0	0
AM0148	M	1980-12-21	28	0	3.75	40108	41420	0		0		0	0
AM0149	M	1962-03-14	48	0	3	40121	41219	0		0		0	0
AM0150	F	1971-11-06	38	0	0	40126	40503	0		0		0	0
AM0155	M	1961-08-15	48	1	5.5	40142	41589	0		1	2012-05-30	0	0
AM0157	M	1949-11-06	60	0	0	40162	41711	1	2014-03-14	0		0	0
AM0159	M	1986-08-21	23	1	1.75	40212	40419	0		0		0	0
AM0160	M	1952-01-27	58	0	3.75	40213	40561	0		0		0	0
AM0161	M	1955-08-19	54	0	3	40214	40917	1	2011-07-06	1	2011-10-06	0	0
AM0166	M	1978-05-24	31	1	3.25	40292	41883	0		1	2011-03-30	0	0
AM0168	M	1971-06-19	39	0	1.25	40281	41295	0		1	2011-01-22	0	0
AM0175	M	1982-09-03	28	0	2.75	40401	41189	0		0		0	0
AM0176	M	2003-01-18	8	1	2.6	40507	41665	1	2014-02-27	1	2012-12-06	0	0
CE0015	M	1965-03-26	42	0	0	39129	40687	0		0		0	0
CE0019	F	1983-11-19	24	0	3.25	39139	41709	0		1	2009-02-18	0	0
CE0020	M	1961-11-14	46	0	4.25	39139	41263	0		0		0	0
CE0023	F	1952-05-10	55	1	5.25	39146	39887	0		1	2008-11-02	0	0
CE0026	F	1976-11-20	31	1	0	39121	41793	0		0		0	0
CE0027	F	1942-01-05	66	1	0	39149	41842	0		0		0	0
CE0029	F	1981-06-03	28	0	0	39150	41822	1	2007-11-19	0		0	0
CE0032	F	1948-08-08	59	0	0	39154	41814	0		0		0	0
CE0033	M	1950-09-19	57	1	0	39154	39861	0		0		0	0
CE0035	M	1946-10-08	61	1	0	39155	41800	1	2007-06-15	0		0	0
CE0039	M	1970-05-11	37	0	5.5	39155	39873	0		1	2009-02-03	0	0
CE0046	F	1952-06-04	55	1	0	39164	41723	0		0		0	0
CE0050	M	1963-08-08	44	0	0	39167	40993	0		0		0	0
CE0056	M	1979-04-12	28	1	2	39170	40342	0		0		0	0
CE0057	F	1973-12-30	34	0	4	39171	39488	1	2007-06-27	0		0	0
CE0060	F	1998-04-06	9	0	0.3	39174	39516	0		1	2007-12-12	0	0
CE0066	M	1944-10-29	63	0	0	39182	41731	1	2007-04-26	0		0	0
CE0067	M	1950-11-05	57	0	0	39182	41800	0		0		0	0
CE0070	M	1961-05-19	46	1	1	39188	41618	1	2013-03-13	0		0	0
CE0071	F	1956-10-09	51	1	1.5	39186	41751	0		1	2007-10-23	0	0
CE0072	M	1982-11-09	28	1	0	39192	41114	1	2007-05-18	1	2007-04-20	0	0
CE0073	M	1979-11-25	28	1	4	39213	41253	1	2007-08-09	0		0	0
CE0074	M	1965-08-23	42	1	0	39195	39412	0		0		0	0
CE0078	M	1954-03-04	53	0	0	39197	39951	0		1	2009-06-24	0	0
CE0079	F	1962-10-12	45	1	0	39197	41779	0		0		0	0
CE0085	M	1958-04-03	49	0	0	39204	41024	0		1	2007-11-14	0	0
CE0086	M	1949-08-01	58	0	0	39204	41770	0		1	2007-12-27	0	0
CE0087	F	1972-06-28	35	1	0	39205	40073	0		1	2009-09-18	0	0
CE0088	F	1944-09-11	63	1	0	39205	41820	1	2007-06-01	1	2009-10-13	0	0
CE0089	M	1948-12-25	59	1	3.25	39206	41077	0		0		0	0
CE0094	M	1942-01-06	66	0	3.8	39216	41505	0		0		0	0
CE0099	F	1949-01-06	59	1	0	39219	39639	0		0		0	0
CE0101	M	1969-11-02	39	1	3.25	39225	41284	1	2007-09-21	1	2007-11-29	0	0
CE0103	M	1955-02-18	55	0	4.6	39223	41814	0		1	2009-09-12	0	0
CE0105	M	1988-05-10	19	1	4	39225	41513	0		1	2010-06-10	0	0
CE0112	M	1982-01-08	26	0	2.8	39246	41770	0		1	2008-09-09	0	0
CE0114	F	1967-09-11	40	1	4	39239	41688	0		0		0	0
CE0118	M	1998-01-17	10	0	3	39247	41213	0		1	2010-10-26	0	0
CE0121	M	1970-12-01	38	1	0	39259	41898	0		0		0	0
CE0123	F	1989-04-01	18	0	0	39266	40578	0		0		0	0
CE0124	F	1963-11-05	44	0	0	39251	41870	1	2008-01-22	0		0	0
CE0126	M	1975-06-03	32	1	4	39254	41422	1	2009-05-22	1	2009-11-05	0	1	2011-09-20
CE0128	M	1953-11-23	54	1	0	39255	41473	0		0		0	0
CE0130	M	1978-05-04	29	1	0	39260	41732	1	2007-07-26	0		0	0
CE0136	F	1964-05-15	43	1	2	39304	41708	1	2007-08-29	0		0	0
CE0138	F	1956-01-02	52	1	4	39268	41556	0		0		0	0
CE0139	M	1956-02-05	51	1	2.25	39266	41136	1	2007-08-01	0		0	0
CE0140	F	1953-09-17	15	0	0	39307	41591	0		0		0	0
CE0146	F	1984-08-29	24	1	4	39281	41821	1	2014-02-25	1	2008-11-26	0	0
CE0149	M	1959-04-27	48	0	4.75	39283	39677	1	2007-08-17	0		0	0
CE0150	F	1958-05-17	49	0	0	39297	41070	1	2007-08-23	0		0	0
CE0156	F	1984-05-13	23	0	4.25	39301	40113	0		0		0	0
CE0157	F	1983-06-10	24	1	2.4	39301	41597	0		0		0	0
CE0159	M	1981-08-23	25	1	4.25	39302	41898	0		0		0	0
CE0161	M	1993-09-26	14	0	0.02	39302	39579	0		1	2007-08-10	0	0
CE0162	M	1973-03-19	34	1	4	39307	41589	1	2007-08-30	1	2008-05-05	0	0
CE0164	F	1980-02-07	27	0	5	39381	41893	0		1	2008-04-08	0	1	2015-01-07
CE0165	F	1964-04-01	43	0	0	39307	41604	0		0		0	0
CE0170	M	1961-08-12	46	1	5	39311	41851	0		1	2008-12-03	0	0
CE0171	M	1972-03-11	35	1	3.8	39314	41877	0		1	2008-03-03	0	0
CE0174	F	1977-10-15	34	0	0	39316	41437	0		0		0	0
CE0175	M	1942-11-13	65	1	3.8	39316	40857	0		1	2008-03-28	0	0
CE0178	F	1957-03-22	54	0	0	39317	41869	0		0		0	0
CE0181	F	1986-11-02	21	1	0.5	39324	40031	0		0		0	0
CE0182	M	1984-04-04	23	0	3.25	39324	41022	0		1	2009-11-30	0	0
CE0188	M	1987-06-26	20	1	3.5	39330	41833	1	2011-01-14	1	2010-04-16	0	0
CE0189	M	1960-01-11	47	0	5.6	39338	41190	0		0		0	0
CE0191	M	1975-10-14	32	1	5.25	39336	41604	1	2007-10-07	0		0	0
CE0194	F	1975-06-13	32	1	0	39336	40449	0		0		0	0
CE0197	F	1987-08-10	23	1	4	39338	41526	0		1	2008-05-23	0	0
CE0199	M	1970-12-21	40	1	5	39339	40688	1	2008-11-12	1	2008-12-11	0	0
CE0200	M	1957-06-09	50	0	0	39349	41525	0		0		0	0
CE0201	F	1970-07-24	37	1	4	39342	41562	1	2007-11-07	0		0	0
CE0204	M	1980-11-25	27	0	5	39343	41975	1	2007-10-08	1	2012-04-18	0	0
CE0205	F	1961-06-09	46	0	4.75	39344	40953	0		1	2010-09-15	0	0
CE0212	F	1957-06-27	50	0	2.75	39353	41120	0		0		0	0
CE0215	F	1967-03-04	40	0	0	39353	41589	0		0		0	0
CE0220	F	1989-01-12	19	1	4.75	39357	41906	1	2012-10-09	1	2008-07-08	0	0
CE0221	M	1969-10-10	38	0	0	39357	40765	1	2007-11-06	0		0	0
CE0223	F	1948-06-18	60	0	0.2	39359	41982	0		0		0	0
CE0225	F	1950-12-13	57	1	2.75	39363	41877	0		1	2008-06-25	0	0
CE0228	M	1990-09-28	17	1	1.8	39366	39859	1	2009-02-16	1	2007-11-10	0	0
CE0230	M	1950-12-26	57	0	3.5	39373	39782	1	2007-11-23	0		0	0
CE0231	F	1953-08-15	54	0	0	39373	41877	0		0		0	0
CE0234	M	1985-11-25	22	1	0	39377	41588	0		0		0	0
CE0236	M	1958-02-07	49	0	0	39394	39762	0		0		0	0
CE0238	M	1967-12-08	43	0	3.4	39379	41905	1	2008-11-13	1	2008-06-24	0	0
CE0239	M	1985-09-27	22	1	0	39379	40114	0		1	2008-04-23	0	0
CE0240	F	1986-02-09	21	0	0.25	39381	41926	0		0		0	0
CE0243	M	1973-04-21	34	0	0	39379	39721	0		1	2008-09-04	0	0
CE0244	F	1963-11-13	44	0	0	39423	41730	0		0		0	0
CE0248	F	1963-03-22	46	1	2.2	39387	40028	0		1	2008-06-19	0	0
CE0251	M	1954-12-13	53	1	4.25	39391	41920	1	2007-12-14	0		0	0
CE0252	M	1946-09-07	61	0	0	39392	40034	0		1	2007-06-11	0	0
CE0255	M	1970-06-09	37	1	0	39398	39770	0		0		0	0
CE0256	M	1957-06-22	50	0	0	39398	41990	0		1	2009-11-19	0	0
CE0257	F	1953-01-08	55	1	5	39399	41562	0		1	2012-02-03	0	0
CE0258	M	1982-07-24	25	1	0	39406	39847	1	2008-03-26	1	2008-02-19	0	0
CE0259	M	1943-11-05	64	1	6	39407	41926	1	2007-12-07	1	2009-05-29	0	0
CE0265	F	1953-11-29	54	1	0	39415	40898	1	2010-01-08	1	2010-04-26	0	0
CE0266	M	1971-09-27	36	0	0	39416	41870	0		0		0	0
CE0268	M	1959-12-03	48	1	0	39785	41946	0		1	2012-06-14	0	0
CE0270	M	1956-03-15	51	1	3.5	39420	41919	0		1	2008-10-14	0	0
CE0271	M	1949-05-19	58	1	5	39423	39737	1	2008-01-15	0		0	0
CE0273	F	1946-12-01	61	1	0	39428	41679	0		0		0	0
CE0274	M	1974-03-12	33	0	3.8	39428	41954	0		1	2008-05-11	0	0
CE0275	F	1971-05-15	36	1	0	39430	41973	0		0		0	0
CE0277	M	1961-04-01	46	0	0	39433	41231	0		1	2007-12-17	0	0
CE0278	M	1952-12-17	55	1	0	39433	41877	0		0		0	0
CE0279	M	1964-01-24	43	0	0	39435	40155	1	2008-02-15	0		0	0
CE0281	M	1957-04-15	50	0	4.8	39455	39825	0		1	2008-07-24	0	0
CE0284	M	1975-10-06	32	0	4.75	39458	41900	0		0		0	0
CE0286	M	1944-01-10	64	1	0	39465	41732	0		1	2009-02-02	0	0
CE0288	F	1963-06-07	45	0	0	39465	41659	0		0		0	0
CE0289	M	1968-11-08	39	1	2.2	39468	41017	0		1	2009-10-29	0	0
CE0293	F	1953-12-18	54	1	1.25	39476	41989	0		1	2009-04-20	0	0
CE0294	F	1970-08-04	41	0	1.75	39485	41889	0		1	2010-05-24	0	0
CE0297	M	1962-08-12	45	1	0	39492	41102	1	2008-04-02	0		0	0
CE0298	M	1979-10-04	28	0	4.6	39497	39826	0		1	2008-07-14	0	0
CE0300	M	1983-07-20	24	1	0	39499	41899	1	2008-03-31	1	2008-10-09	0	0
CE0302	F	1994-11-08	13	0	3	39500	41876	1	2008-10-24	0		0	0
CE0303	F	1955-06-20	52	1	0	39510	40855	1	2008-04-28	1	2008-04-28	0	0
CE0305	F	1956-02-04	55	0	0	39510	41681	0		0		0	0
CE0306	M	1966-12-26	41	0	0	39514	41961	0		0		0	0
CE0307	M	1954-08-04	53	0	0	39512	41729	0		0		0	0
CE0309	F	1961-03-04	47	0	5	39517	41709	0		1	2010-11-08	0	0
CE0310	M	1942-07-09	65	1	0	40725	41868	0		0		0	0
CE0311	F	1987-12-31	20	0	0	39520	41254	0		0		0	0
CE0312	F	1971-10-26	36	0	0	39519	40373	0		0		0	0
CE0315	M	1945-08-20	62	1	3.4	39534	41731	0		0		0	0
CE0316	F	1959-08-30	48	1	0	39535	41946	0		0		0	0
CE0317	M	1948-05-11	59	1	0	39535	41253	0		0		0	0
CE0319	M	1968-11-26	39	1	1	39538	40105	0		1	2008-03-31	0	0
CE0320	F	1954-09-30	53	0	0.1	39542	41353	1	2009-04-06	0		0	0
CE0323	F	1962-10-12	45	0	0	39547	41765	0		0		0	0
CE0324	F	2000-03-29	8	1	0	39547	39924	0		0		0	0
CE0325	M	1980-08-09	27	1	0.75	39549	41772	0		0		0	0
CE0328	F	1956-01-01	52	0	0	39552	41918	0		0		0	0
CE0329	F	1944-06-03	63	0	3.75	39553	41414	0		0		0	0
CE0330	F	1960-05-27	47	1	4.75	39553	41729	0		1	2011-11-18	0	0
CE0332	M	1944-03-19	64	0	5.2	39503	40337	1	2010-01-18	1	2010-01-13	0	0
CE0334	M	1977-08-21	30	0	3.8	39566	41765	0		0		0	0
CE0336	M	1993-07-09	18	0	5	39567	40972	0		1	2010-10-19	0	0
CE0338	F	1994-02-09	14	0	4.25	39568	41799	0		1	2010-11-01	0	0
CE0341	M	1959-09-22	48	0	0.6	39576	40454	0		1	2008-08-05	0	0
CE0342	M	1977-09-27	30	0	5.2	39575	41925	0		0		0	0
CE0343	F	1964-04-15	44	0	0	39577	39944	0		0		0	0
CE0344	M	1985-10-11	22	0	0	39583	41130	0		1	2010-06-05	0	0
CE0345	F	1975-11-11	32	1	0	39583	40966	0		0		0	0
CE0346	F	1976-03-17	32	1	1.75	39596	41554	0		0		0	0
CE0347	M	1969-09-24	38	0	4.5	39596	41793	0		1	2009-09-02	0	0
CE0348	M	1954-10-18	53	1	0	39598	41879	0		0		0	0
CE0349	M	1973-03-23	35	0	0	39597	40314	1	2010-05-17	1	2008-06-27	0	0
CE0350	F	1949-06-30	59	1	0.5	39615	41765	1	2008-07-14	0		0	0
CE0352	M	1954-06-09	54	0	4.8	39610	41799	0		1	2009-10-13	0	0
CE0355	F	1983-12-29	27	1	0	39626	41826	0		0		0	0
CE0356	M	1958-10-16	49	1	0	39630	41793	0		0		0	0
CE0357	M	1962-08-05	45	1	0	39633	41837	0		0		0	0
CE0358	M	2000-01-02	8	0	5	39638	41917	0		1	2010-12-07	0	0
CE0359	M	1947-03-13	64	1	4.5	39640	39903	0		0		0	0
CE0361	F	1962-10-17	45	0	0	39645	40259	0		0		0	0
CE0362	F	1962-06-28	46	0	0	39650	41933	0		0		0	0
CE0364	F	1960-07-18	48	1	0	39661	41870	0		0		0	0
CE0365	M	1984-02-02	24	1	5	39661	41911	1	2008-09-09	1	2009-10-20	0	0
CE0366	M	1944-06-10	64	0	0.06	39666	41862	0		0		0	0
CE0367	F	1987-03-10	21	0	5	39674	41861	0		1	2010-07-05	0	0
CE0369	M	1949-12-14	58	1	0	39720	41914	0		1	2009-05-26	0	0
CE0370	M	1950-04-16	58	0	2.75	39689	41690	1	2008-10-02	1	2009-03-13	0	0
CE0372	F	1968-09-19	39	1	5.75	39702	42024	0		0		0	0
CE0374	M	1954-06-29	54	1	3.25	39707	41554	0		1	2009-08-04	0	0
CE0377	M	1974-12-06	33	0	4.75	39724	40492	0		1	2009-12-29	0	0
CE0378	F	1952-04-10	56	0	5.75	39729	41779	0		0		0	0
CE0379	M	1942-11-27	65	1	0	39730	41779	0		0		0	0
CE0383	M	1949-11-14	58	0	4.8	39744	41970	0		1	2009-05-28	0	0
CE0384	M	1949-01-24	60	0	4.75	39749	41920	1	2009-10-15	1	2009-10-15	0	0
CE0385	F	1957-01-21	51	0	5.75	39752	41975	1	2010-11-10	1	2010-01-12	0	0
CE0387	F	1958-11-01	50	0	1.5	39757	41947	0		1	2010-06-01	0	0
CE0388	M	1969-08-15	39	1	0	39758	41842	0		0		0	0
CE0390	M	1952-02-22	56	1	6	39759	40559	0		0		0	0
CE0391	F	1953-05-20	55	0	2	39763	41926	0		0		0	0
CE0393	F	1967-10-17	41	1	0	39764	41675	0		0		0	0
CE0394	F	1981-03-04	27	1	0	39763	40099	0		0		0	0
CE0396	F	1964-11-15	43	0	5.25	39765	41344	0		1	2009-09-28	0	0
CE0399	M	1978-01-18	30	1	5	39766	41933	0		1	2009-11-24	0	0
CE0400	F	1983-03-16	25	0	0	39771	40134	0		0		0	0
CE0402	M	1980-06-02	28	0	4.8	39772	41620	0		0		0	0
CE0406	M	1963-04-09	45	0	5.25	39783	40302	1	2009-02-03	0		0	0
CE0407	F	1969-07-16	39	0	2.4	39786	41975	1	2012-02-10	1	2011-04-07	0	0
CE0408	F	1960-04-06	48	1	0	39790	40262	0		1	2009-09-01	0	0
CE0409	F	1990-11-11	18	1	0	39786	41982	0		0		0	0
CE0410	M	1972-02-09	36	0	6	39786	41669	1	2009-02-05	1	2010-01-15	0	0
CE0411	F	1946-12-04	62	1	3.75	39787	41984	0		1	2009-08-17	0	0
CE0415	M	1949-10-16	59	0	5.4	39792	41261	0		0		0	0
CE0418	F	1946-03-20	62	0	0	39800	41646	1	2009-01-12	0		0	0
CE0419	M	1960-10-14	48	1	5.5	39800	41975	1	2009-09-23			0	0
CE0421	M	1996-09-27	12	0	0	39826	41711	0		0		0	0
CE0427	F	1965-04-04	43	1	0	39847	41680	0		1	2009-03-09	0	0
CE0428	M	1988-12-26	20	0	5.5	39889	41876	0		0		0	0
CE0430	M	1964-10-30	44	0	2.5	39854	41765	0		0		0	0
CE0432	F	1968-10-27	40	0	5	39855	41730	1	2009-03-11	0		0	0
CE0434	F	1989-03-31	19	0	0	39857	41766	0		0		0	0
CE0436	F	1965-04-18	43	1	0.6	39509	41758	0		1	2009-08-04	0	0
CE0437	M	1956-08-05	52	0	2.75	39925	41772	0		0		0	0
CE0439	M	1946-11-29	62	1	6	39883	41772	0		1	2011-11-30	0	0
CE0440	F	1991-07-13	17	1	0	39884	41282	0		1	2010-02-03	0	0
CE0441	M	1953-09-03	55	1	4.75	39889	41212	0		1	2011-02-09	0	0
CE0443	M	1950-02-11	59	1	5	39890	41322	0		1	2009-04-17	0	0
CE0444	F	1953-11-28	57	1	4.4	39890	41772	0		0		0	0
CE0445	M	1957-02-08	52	1	0.4	39525	41674	1	2009-04-16	1	2009-05-06	0	0
CE0447	M	1975-03-15	34	0	0	39902	41332	0		0		0	0
CE0450	M	1980-05-12	28	0	0.06	39903	40342	0		0		0	0
CE0451	M	1955-10-29	53	0	3.75	39546	41737	1	2009-05-06	1	2009-06-05	0	0
CE0452	F	1959-04-25	52	1	0	39909	41903	1	2009-11-18	1	2010-01-22	0	0
CE0453	M	1976-09-05	32	0	5	39911	41765	0		1	2011-07-13	0	0
CE0456	M	1968-01-01	41	0	3.75	39920	41764	0		1	2010-11-18	0	0
CE0457	M	1955-12-06	53	1	5	39919	41730	0		0		0	0
CE0458	F	1945-07-30	63	0	5.6	39926	40371	1	2009-05-25	1	2009-04-23	0	0
CE0460	F	1987-10-08	21	0	4	39931	41331	0		1	2010-10-13	0	0
CE0461	F	1958-04-03	51	0	3.5	39933	41940	1	2010-04-29	0		0	0
CE0463	M	1969-03-19	42	0	0	39941	40359	0		0		0	0
CE0464	M	1983-07-01	25	0	3.8	39938	40764	0		0		0	0
CE0469	M	1950-12-29	60	0	3.2	39947	41961	0		0		0	0
CE0470	F	1995-05-22	13	0	3.75	39948	41735	0		0		0	0
CE0471	F	1971-12-13	37	0	1.75	39986	41826	1	2011-06-09	0		0	0
CE0472	M	1973-11-10	35	1	2.75	39948	40504	0		1	2010-01-02	0	0
CE0473	M	1973-07-18	35	0	0	39951	40289	0		0		0	0
CE0476	M	1954-11-20	54	0	3.8	39961	41871	1	2010-03-08	0		0	0
CE0477	F	1976-08-09	32	1	5.2	39962	41842	0		0		0	0
CE0479	F	1975-08-29	33	0	2.2	39969	40445	1	2009-09-28	1	2009-02-09	0	0
CE0480	M	1952-12-05	56	1	0	39969	41794	0		0		0	0
CE0482	M	1991-05-01	18	1	5	39973	41590	1	2009-08-03	1	2011-05-18	0	0
CE0484	F	1981-09-10	27	1	0	39976	41779	0		0		0	0
CE0487	M	2047-08-30	62	0	1	39987	41870	1	2009-11-06	0		0	0
CE0491	M	1955-10-11	53	1	4	39993	41877	1	2009-08-19	0		0	0
CE0495	F	1974-01-28	35	1	3.5	40023	41814	0		0		0	0
CE0496	F	1950-06-05	59	0	3.2	40016	41856	0		0		0	0
CE0497	M	1956-11-15	52	1	4.8	40025	40720	1	2010-03-23	1	2010-03-23	0	0
CE0498	F	1960-03-03	49	1	5	40035	40330	1	2009-09-14	1	2009-10-08	0	0
CE0502	M	1959-08-03	50	1	5	40037	41799	0		1	2010-08-16	0	0
CE0507	M	1946-07-16	63	1	0	40059	41260	0		0		0	0
CE0510	F	1966-02-04	43	1	0	40070	41744	1	2009-10-20	1	2010-11-08	0	0
CE0511	M	1974-10-08	35	0	4	40071	40791	1	2011-01-18	1	2011-01-18	0	0
CE0512	M	1993-06-02	16	1	4.6	39920	41290	1	2009-10-08	0		0	0
CE0514	F	1963-09-21	46	0	4	40074	41960	1	2010-05-20	1	2010-09-07	0	0
CE0515	M	1946-02-03	63	1	0	40073	41875	1	2009-10-21	0		0	0
CE0517	M	1985-10-28	23	1	4	40078	41940	0		1	2010-05-20	0	0
CE0518	F	1969-05-11	40	0	1	40116	41883	0		0		0	0
CE0525	M	1968-03-25	41	1	4	40184	41800	0		1	2011-07-10	0	0
CE0528	M	2048-03-03	61	1	4	40114	41917	0		1	2011-04-01	0	0
CE0529	F	1994-11-19	15	1	0	40114	41751	0		1	2010-08-30	0	0
CE0533	F	2047-02-28	62	0	3.5	40123	41948	0		1	2011-10-19	0	0
CE0539	M	1980-11-10	30	1	0	40133	41239	0		1	2012-09-14	0	0
CE0540	F	1987-04-14	24	1	0	40140	41618	0		1	2009-11-23	0	0
CE0541	F	1972-05-01	37	1	0	40133	40673	0		0		0	0
CE0544	M	1959-05-07	50	1	4.5	40143	41772	0		1	2011-12-21	0	0
CE0545	F	1956-04-05	53	0	0	40149	41625	0		0		0	0
CE0546	F	1965-11-23	44	1	3.6	40150	41954	0		1	2010-11-24	0	0
CE0547	F	1957-04-29	52	1	3.5	40165	41821	1	2012-05-18	1	2012-05-17	0	0
CE0548	F	1962-06-02	47	1	0.6	40183	41681	0		0		0	0
CE0552	F	1968-11-09	41	1	4	40203	41841	0		1	2012-03-15	0	0
CE0553	F	1955-04-29	54	1	0	40200	41665	0		0		0	0
CE0554	M	1952-04-14	57	0	2	40204	41604	1	2010-03-17	0		0	0
CE0556	F	1950-01-25	60	1	0	40207	42024	0		0		0	0
CE0557	M	1949-05-12	61	0	3.75	40213	40576	0		0		0	0
CE0558	M	1947-01-17	63	1	4	40214	40574	1	2010-03-03	0		0	0
CE0559	F	1990-03-11	19	1	0	40217	40421	0		0		0	0
CE0560	F	1952-02-05	58	1	3.6	40218	41681	0		0		0	0
CE0561	M	1991-06-16	18	1	4.5	40218	41907	0		0		0	0
CE0562	M	1950-12-20	59	0	5.5	40231	40594	1	2010-03-22	0		0	0
CE0563	F	1957-04-19	52	0	0	40234	41679	1	2010-03-25	1	2010-03-26	0	0
CE0565	M	1966-09-21	43	1	2.8	40232	41673	0		0		0	0
CE0571	M	1963-04-07	46	0	3.4	40248	41364	1	2010-03-26	1	2011-07-20	0	0
CE0576	M	1977-11-13	32	1	2.25	40267	40646	0		0		0	0
CE0578	M	1965-03-05	45	0	3.75	40287	41707	0		1	2010-06-12	0	0
CE0581	M	1955-10-15	54	1	4	40315	41932	0		0		0	0
CE0582	M	1961-02-22	49	1	1.75	40312	41870	0		0		0	0
CE0583	M	1979-12-12	30	1	0	40323	41940	0				0	0
CE0584	M	1966-10-26	43	0	0	40322	41940	0		1	2011-06-22	0	0
CE0585	M	1993-07-10	17	0	2.8	40324	41877	0		0		0	0
CE0586	M	1958-11-12	52	1	5.5	40326	40723	1	2010-06-17	1	2010-09-24	0	0
CE0587	M	1971-11-20	39	1	5	40326	41842	0		1	2011-04-05	0	0
CE0589	M	1967-04-07	43	1	4	40331	41744	0		1	2010-12-22	0	0
CE0591	M	1960-02-15	50	0	1	40429	41836	1	2014-08-13	1	2011-12-14	0	0
CE0592	M	1948-10-05	62	0	4	40340	41434	1	2010-06-28	1	2011-10-13	0	0
CE0594	M	1948-04-17	62	1	4.5	40344	41779	0		0		0	0
CE0595	M	1963-01-17	48	0	4	40351	41788	0		1	2011-04-19	0	0
CE0597	F	1978-02-13	32	1	1.6	40351	41744	1	2011-09-16	1	2011-04-28	0	0
CE0599	M	1951-04-16	59	1	3.75	40358	41844	1	2010-07-26	0		0	0
CE0601	F	1989-07-19	21	0	0	40374	41527	0		0		0	0
CE0602	M	1989-02-14	21	1	4.8	40385	41856	1	2010-08-23	1	2011-06-15	0	0
CE0603	M	1973-04-08	37	0	0	40385	40751	0		0		0	0
CE0605	M	1957-08-31	53	1	4.8	40387	41877	1	2010-08-25	0		0	0
CE0607	M	1950-05-15	60	0	4.8	40408	41130	1	2012-03-21	1	2012-03-21	0	0
CE0609	M	1977-01-20	34	0	4.5	40403	41855	0		1	2012-11-02	0	0
CE0610	M	1952-08-23	58	0	3.6	40415	41814	1	2010-09-14	1	2012-03-28	0	0
CE0612	F	1975-09-23	35	1	3.75	40694	41898	0		1	2012-01-25	0	0
CE0613	M	1964-06-24	46	0	3.5	40434	41828	0		1	2011-08-06	0	0
CE0616	F	1963-02-02	48	1	0	40444	41905	0		1	2011-07-20	0	0
CE0617	M	2046-07-29	64	0	0	40449	41156	1	2010-10-27	1	2010-09-28	0	0
CE0618	M	1965-12-30	45	1	4	40449	41933	1	2013-08-14	1	2011-09-13	0	0
CE0619	M	1960-06-22	50	1	4.25	40451	41884	0		1	2011-09-28	0	0
CE0620	M	1970-02-26	41	0	0	40452	41940	1	2012-02-14	0		0	0
CE0625	M	1975-05-06	36	0	2.6	40478	41925	1	2012-05-22	1	2012-11-05	0	0
CE0628	F	1965-06-02	45	1	0	40845	41947	0		0		0	0
CE0630	M	1971-12-20	39	1	4.8	40494	41115	0		0		0	0
CE0635	M	1964-05-20	46	1	4.25	40549	41666	0		1	2012-09-01	0	0
CE0636	M	1983-03-11	27	1	4.5	40550	41448	1	2011-01-31	1	2012-11-27	0	0
CE0638	M	1981-02-24	29	1	4	40561	41652	0		1	2012-08-28	0	0
CE0639	M	1963-01-17	48	0	4.75	40563	41015	0		1	2012-02-02	0	0
CE0642	F	1967-06-30	43	1	4	40567	41667	0		0		0	0
CE0643	F	1969-01-22	42	1	0	40570	40953	0		0		0	0
CE0644	M	1946-11-18	64	1	1	40576	40751	0		0		0	0
CE0646	F	1954-08-23	56	1	3.75	40582	41728	0		0		0	0
CE0648	M	1954-05-19	56	0	3.5	40589	41793	0		0		0	0
CE0650	F	1962-11-03	48	0	4	40592	40967	0		0		0	0
CE0651	F	1970-11-05	40	0	5	40591	41309	0		1	2011-04-15	0	0
CE0652	M	1979-06-05	31	0	4	40596	41696	0		0		0	0
CE0656	M	1959-09-18	51	1	0.25	40619	41742	1	2011-05-19	0		0	0
CE0659	F	1989-08-03	21	1	0.2	40644	41709	0		0		0	0
CE0664	M	1985-11-23	26	0	3.25	40666	41172	0		1	2012-06-20	0	0
CE0665	M	1968-07-10	42	1	4.5	40675	41795	1	2011-06-10	0		0	0
CE0666	M	1981-02-03	30	1	3.8	40676	41022	0		0		0	0
CE0668	F	1956-09-12	54	1	0	40687	41799	0		0		0	0
CE0669	M	1954-07-30	56	1	1	40688	41399	0		1	2011-12-12	0	0
CE0670	M	1970-10-07	40	1	5.75	40688	41751	1	2012-02-08	0		0	0
CE0671	F	1953-03-11	58	0	0	40694	41764	0		0		0	0
CE0672	M	1955-06-16	55	1	0.8	40694	41765	0		0		0	0
CE0673	F	1947-05-30	64	1	5	40715	41918	1	2011-07-19	1	2012-01-20	0	0
CE0674	M	1954-12-01	56	0	4	40724	40947	0		1	2011-12-07	0	0
CE0676	M	1993-09-30	17	0	4.4	40742	41970	0		1	2012-09-04	0	0
CE0678	F	1974-05-14	37	0	1	40757	41856	0		0		0	0
CE0680	M	1974-03-12	37	0	3.75	40773	41085	1	2011-10-21	1	2011-10-14	0	0
CE0681	M	1976-07-20	35	1	0	40780	41855	1	2011-12-06	0		0	0
CE0685	M	1974-11-19	36	1	0	40821	41247	0		1	2011-09-28	0	0
CE0686	F	1977-03-13	34	0	0	40806	41918	0		0		0	0
CE0688	M	1952-08-02	59	0	4	40843	41540	1	2012-02-28	0		0	0
AM0004	M	1975-11-21	33	0	4	39161	41037	0		1	2007-03-20	1	0
AM0009	M	1979-04-04	30	1	3.25	39170	40832	0		1	2007-03-28	1	0
AM0011	F	1975-09-29	34	1	1.25	39175	41357	0		1	2007-07-23	1	0
AM0022	F	1981-02-02	28	0	4	39211	41365	0		1	2007-03-07	1	0
AM0025	M	1987-09-23	20	0	3.5	39213	41241	0		1	2007-11-05	1	0
AM0050	M	1985-11-08	24	1	3.25	39335	41220	0		1	2007-09-10	1	0
AM0083	M	1981-11-11	26	0	5.5	39524	40604	1	2008-08-11	1	2008-11-08	1	0
AM0089	M	1989-04-15	19	1	5	39580	39779	0		1	2008-12-05	1	0
AM0092	M	1950-05-13	58	1	4.25	39588	41764	0		1	2008-07-15	1	0
AM0093	F	1964-08-27	43	0	1.75	39597	41135	0		1	2008-11-13	1	0
AM0094	M	1999-04-09	9	1	3.25	39597	41129	0		1	2008-05-29	1	0
AM0097	M	2000-04-19	9	1	0	39618	41127	0		1	2008-06-19	1	0
AM0099	F	1943-10-16	64	0	0	39625	41862	0		1	2008-12-18	1	0
AM0101	M	1945-04-28	63	1	2	39660	41827	0		1	2008-10-31	1	0
AM0102	M	1950-12-19	57	0	2	39665	40399	0		1	2008-05-08	1	0
AM0104	F	1992-12-11	18	0	4.5	39675	369845	0		1	2008-09-15	1	0
AM0111	M	1970-06-29	38	0	1.75	39716	41598	1	2009-03-20	1	2008-10-23	1	0
AM0115	M	1998-10-02	10	1	3.5	39770	41114	0		1	2008-12-16	1	0
AM0121	M	1969-06-29	39	1	3.25	39818	41771	1	2013-02-25	1	2009-04-24	1	0
AM0131	M	1962-08-15	47	0	1.5	39864	41260	0		1	2009-02-18	1	0
AM0136	M	1945-08-13	64	0	0	39944	41750	0		1	2009-08-06	1	0
AM0144	M	1992-01-24	17	0	1	40003	41045	1	2012-05-17	1	2009-09-17	1	0
AM0145	M	2000-03-12	9	0	4	40011	41820	0		1	2009-10-12	1	0
AM0151	F	1961-08-31	48	1	3.5	40128	41582	1	2013-12-05	1	2010-08-02	1	0
AM0163	M	1981-03-19	29	1	1	40227	41715	1	2011-12-28	1	2010-10-05	1	0
AM0167	M	1977-05-17	32	1	1	40268	41371	1	2011-04-04	1	2010-07-06	1	0
AM0171	M	1966-06-12	44	1	2.25	40337	40682	0		1	2010-06-08	1	0
AM0172	F	1990-06-25	20	1	4.5	40344	40694	0		1	2010-07-12	1	0
CE0031	M	1981-05-25	26	0	4.25	39153	41897	0		1	2007-12-03	1	0
CE0037	F	1988-07-11	19	0	0	39156	41583	0		1	2007-09-05	1	0
CE0038	F	1957-02-05	50	0	0.4	39156	41323	0		1	2007-05-07	1	0
CE0043	M	1974-04-28	37	1	3.75	39157	41707	0		1	2007-12-06	1	0
CE0044	M	1983-11-28	24	1	5.5	39163	40738	0		1	2007-05-16	1	0
CE0049	F	1971-05-04	36	0	0.66	39164	41710	0		1	2007-07-13	1	0
CE0052	M	1964-02-27	43	1	2.26	39169	41772	0		1	2007-03-28	1	0
CE0054	F	1962-11-02	45	0	0	39169	41891	0		1	2007-09-17	1	0
CE0077	F	1958-12-12	49	1	3.25	39198	41814	1	2009-07-14	1	2007-09-17	1	0
CE0083	M	1954-08-10	53	0	4.8	39199	41826	1	2007-05-15	1	2007-01-06	1	0
CE0091	F	1950-04-02	57	0	0	39233	41900	0		1	2007-05-31	1	0
CE0095	M	1959-09-09	48	1	0	39217	41821	0		1	2007-05-30	1	0
CE0104	M	1952-11-22	54	1	0	39224	41576	1	2007-06-15	1	2007-05-22	1	0
CE0110	M	1962-08-29	45	1	4.4	39233	41513	0		1	2007-10-21	1	0
CE0111	M	1954-08-23	53	1	0	39241	41625	0		1	2007-08-06	1	0
CE0113	M	1976-04-26	31	0	2.8	39234	41253	0		1	2007-09-07	1	0
CE0115	M	1995-05-27	12	1	2	39246	41834	0		1	2007-09-24	1	0
CE0117	M	1948-06-28	59	0	0	39246	39979	0		1	2007-11-14	1	0
CE0122	F	1978-10-28	29	1	0	39254	41493	0		1	2007-06-21	1	0
CE0127	M	1971-03-29	36	0	3.5	39258	41893	0		1	2007-11-20	1	0
CE0134	F	1979-11-20	28	0	0	39262	41113	0		1	2007-08-24	1	0
CE0137	M	1996-03-25	11	0	5	39266	41366	0		0		1	0
CE0142	M	1946-09-10	61	1	5	39273	40771	1	2007-08-07	1	2007-11-27	1	0
CE0144	M	1990-11-30	17	0	1	39302	40738	1	2008-10-13	1	2007-07-13	1	0
CE0145	M	1958-09-08	49	1	5	39276	41886	1	2007-08-13	1	2007-07-13	1	0
CE0151	M	1983-03-11	24	0	5	39297	41498	1	2007-08-31	1	2007-08-27	1	0
CE0160	M	1974-11-15	33	0	0	39302	41926	1	2007-11-09	1	2007-05-09	1	0
CE0166	M	1962-12-19	45	0	2.5	39290	41891	0		1	2007-08-24	1	0
CE0172	F	1982-05-15	26	1	3	39315	40476	0		1	2007-10-16	1	0
CE0180	F	1979-04-30	28	0	4.05	39322	41535	1	2008-01-07	1	2007-08-10	1	0
CE0183	M	1984-08-28	25	0	1.5	39325	41346	1	2007-09-27	1	2007-08-31	1	0
CE0184	M	1968-12-27	39	1	2.6	39325	41982	1	2007-09-24	1	2007-08-31	1	0
CE0185	M	1962-09-25	45	1	5.25	39328	41589	1	2007-10-17	1	2007-01-11	1	0
CE0193	M	1943-06-13	64	1	0	39336	41947	0		1	2007-12-13	1	0
CE0207	F	1996-01-23	11	0	3.75	39350	40625	1	2007-10-25	1	2007-10-25	1	0
CE0208	M	1990-08-05	20	1	4.75	39359	41917	1	2007-10-19	1	2007-04-10	1	1	2015-04-08
CE0211	F	1955-05-05	52	0	1.8	39351	41618	0		1	2008-02-15	1	0
CE0217	M	1955-03-17	52	1	0.75	39356	41575	1	2007-10-29	1	2007-01-10	1	0
CE0219	F	1959-10-15	49	0	2.25	39357	40112	1	2007-10-31	1	2007-10-31	1	0
CE0229	M	1952-09-21	55	1	4	39372	41603	1	2007-11-09	1	2008-04-17	1	0
CE0232	M	1953-03-27	58	1	1	39373	41611	1	2010-03-31	1	2007-10-18	1	0
CE0242	F	1967-12-01	40	0	4.4	39379	41737	0		1	2007-11-21	1	0
CE0247	M	1999-10-05	9	0	2.6	39386	41324	0				1	0
CE0249	F	1971-11-07	36	1	3.75	39391	41821	0		1	2008-03-03	1	0
CE0267	F	1959-05-30	49	1	4.5	39416	41946	1	2008-04-25	1	2007-11-30	1	0
CE0276	M	1969-06-18	39	0	5	39454	41773	0		1	2008-08-05	1	0
CE0282	M	1971-03-30	36	0	4	39456	41673	1	2008-02-26	1	2008-07-01	1	0
CE0287	M	1956-05-15	55	1	5	39462	39828	1	2008-02-11	1	2008-01-15	1	0
CE0295	M	1956-09-13	51	1	1.06	39486	41354	0		1	2008-02-22	1	0
CE0299	M	1960-08-06	47	0	1.75	39499	39895	0		1	2008-01-21	1	0
CE0313	M	1959-07-20	48	0	1.4	39520	41735	1	2008-09-10	1	2008-03-18	1	0
CE0314	M	1966-06-25	41	1	5	39524	41871	0		1	2008-07-05	1	0
CE0327	M	1945-03-19	63	0	3.4	39552	41561	1	2009-04-14	1	2008-10-07	1	0
CE0331	M	1960-05-10	49	1	0	39553	41870	0		1	2008-04-15	1	0
CE0337	M	1979-01-26	29	0	4	39567	41799	0		1	2008-03-06	1	0
CE0339	F	1958-04-26	50	0	4	39570	41765	1	2009-10-21	1	2008-05-21	1	0
CE0340	M	1959-08-22	48	1	4.6	39574	40672	0		1	2008-04-07	1	0
CE0351	M	1954-07-31	53	0	0	39604	40318	0		1	2008-08-07	1	0
CE0353	M	1964-11-06	43	1	4	39615	41849	1	2008-10-08	1	2008-08-10	1	0
CE0354	M	1945-05-01	63	1	4.5	39619	40640	0		1	2008-07-25	1	0
CE0363	M	1965-04-12	43	1	4.75	39651	41800	0		1	2008-11-18	1	0
CE0368	M	1981-07-10	27	0	5	39674	41932	1	2009-01-22	1	2008-10-17	1	0
CE0371	M	1981-07-29	29	1	0.5	39701	41940	1	2012-12-06	1	2008-10-09	1	0
CE0373	F	1990-04-17	18	1	1.4	39702	41165	0		1	2008-11-09	1	0
CE0375	F	1982-07-10	26	1	0	39722	41870	1	2009-08-25	1	2009-02-26	1	0
CE0376	M	1983-10-05	25	1	1	39722	41786	0		1	2009-04-03	1	0
CE0380	M	1944-03-12	64	0	3.6	39741	41562	0		1	2008-08-12	1	0
CE0389	M	1979-05-28	29	1	4.5	39759	41479	1	2009-06-04	1	2009-06-05	1	0
CE0392	M	1955-07-29	53	1	4.2	39763	41582	0		1	2009-03-20	1	0
CE0395	F	1957-04-10	51	0	0	39765	41891	0		1	2009-01-15	1	0
CE0397	M	1956-08-03	54	0	4.2	39765	41252	0		1	2008-12-17	1	0
CE0398	M	1973-01-21	35	1	4	39765	40503	1	2009-07-07	1	2008-12-11	1	0
CE0401	M	1956-01-28	52	1	4.5	39769	41987	0		1	2008-12-19	1	0
CE0404	M	1958-05-29	51	1	5.2	39778	41954	1	2009-02-09	1	2009-01-28	1	0
CE0405	M	1955-03-01	53	1	1.4	39779	41898	0		1	2008-11-26	1	0
CE0414	F	1951-08-06	57	1	1.5	39792	41970	1	2011-09-29	1	2009-01-26	1	0
CE0417	M	1959-12-21	48	1	2.2	39793	42010	1	2009-01-30	1	2009-04-15	1	0
CE0422	M	1980-12-27	28	1	0	39822	41849	0		1	2009-03-20	1	0
CE0423	M	1963-12-23	45	0	3	39843	41910	0		1	2009-04-08	1	0
CE0424	F	1987-02-13	21	1	2.2	39834	41289	0		1	2009-01-21	1	0
CE0425	M	1995-06-14	13	0	0	39835	41876	0		1	2009-01-21	1	0
CE0426	M	2001-04-10	7	0	1.2	40021	41507	0		1	2009-12-02	1	0
CE0429	M	1966-11-14	42	0	3.8	39850	41263	0		1	2009-12-06	1	0
CE0433	F	1976-11-08	32	0	0	39857	41596	0		1	2009-02-18	1	0
CE0438	M	1958-10-10	50	0	1	39883	40995	0		1	2009-08-04	1	0
CE0446	M	1945-06-07	63	1	0	39899	41695	1	2009-04-24	1	2009-05-15	1	0
CE0449	M	1995-08-21	13	1	1.8	39905	41198	0		1	2009-06-29	1	0
CE0454	M	1964-09-30	44	0	1.5	39911	41737	0		1	2009-05-08	1	0
CE0455	M	1981-05-16	27	1	4.4	39923	40296	0		1	2009-07-13	1	0
CE0459	F	1972-07-30	36	0	0	39930	41877	0		1	2009-06-26	1	0
CE0466	F	1999-03-10	10	1	4.6	39941	41793	1	2009-06-08	1	2009-09-07	1	0
CE0467	F	1963-04-21	46	0	4.4	39946	41008	0		1	2009-09-18	1	0
CE0474	M	1974-03-25	35	0	5	39953	41800	1	2014-06-11	1	2009-07-08	1	0
CE0475	M	1964-05-23	45	1	5	39953	41752	0		1	2009-07-08	1	0
CE0481	M	1979-11-13	29	1	2.2	39972	41924	0		1	2009-08-31	1	0
CE0483	M	1966-03-19	43	0	4.75	39976	41752	1	2009-08-14	1	2009-03-09	1	0
CE0485	M	1957-11-06	51	0	2	39980	41800	1	2011-03-25	1	2009-08-10	1	0
CE0486	F	1956-05-29	53	1	1.8	39983	41918	1	2011-11-09	1	2009-11-13	1	0
CE0488	M	1951-12-19	57	0	5.8	39988	40384	0		1	2009-09-30	1	0
CE0489	M	1987-04-11	22	0	4.4	39993	41821	1	2009-09-03	1	2009-06-29	1	0
CE0490	M	1987-04-20	22	0	4	39995	41569	0		1	2009-07-08	1	0
CE0492	M	1983-10-25	25	0	0.5	40002	40738	1	2009-08-24	1	2009-10-15	1	0
CE0493	M	1956-06-11	53	1	4.2	40014	41926	1	2009-08-31	1	2010-01-20	1	0
CE0494	M	1961-11-27	47	1	5.5	40014	41821	1	2009-10-21	1	2009-10-21	1	0
CE0499	F	1960-01-02	49	1	0	40035	41157	0		1	2009-11-27	1	0
CE0506	F	1975-06-16	34	1	1.4	40059	41924	1	2010-04-26	1	2009-09-09	1	0
CE0508	M	1981-06-07	29	0	3.6	40070	41492	0		1	2010-01-28	1	0
CE0509	M	1997-07-01	12	1	5	40070	41569	0		1	2009-12-15	1	0
CE0513	F	1970-09-12	39	1	1.75	40073	40833	0		1	2009-09-30	1	0
CE0516	M	1955-05-13	54	0	3	40077	41569	0		1	2010-03-17	1	0
CE0519	F	1979-12-23	29	1	4	40100	41927	0		1	2009-10-14	1	0
CE0521	M	1991-12-05	17	0	4.4	40100	41576	1	2009-10-29	1	2009-10-22	1	0
CE0522	M	1977-10-13	32	0	3.75	40102	41940	0		1	2009-10-21	1	0
CE0523	F	1958-06-29	51	1	5	40106	41973	0		1	2009-10-14	1	0
CE0530	M	1988-06-22	21	1	4.4	40121	41946	1	2010-02-10	1	2010-03-18	1	0
CE0532	M	1984-10-28	25	1	4	40121	41603	1	2009-12-01	1	2009-01-12	1	0
CE0534	M	1993-03-23	16	0	4.75	40127	41924	0		1	2009-10-11	1	0
CE0535	M	1980-10-19	29	0	3.3	40127	41784	1	2009-12-17	1	2009-10-11	1	0
CE0537	M	1982-09-02	27	0	0	40129	42010	0		1	2009-12-11	1	0
CE0538	M	1981-06-04	28	1	3.2	40133	41947	0		1	2009-11-16	1	0
CE0551	M	1968-06-04	41	0	5	40196	41623	0		1	2010-05-17	1	0
CE0564	F	1963-09-27	46	1	0.4	40232	41674	0		1	2010-08-18	1	0
CE0567	F	1985-09-25	24	1	4	40238	41772	1	2010-03-16	1	2010-06-14	1	0
CE0570	M	1992-01-13	18	0	1.56	40241	41044	0		1	2010-06-04	1	0
CE0572	M	1984-03-11	26	1	4	40248	41344	0		1	2010-08-18	1	0
CE0573	M	1991-02-02	19	1	1.25	40254	41793	0		1	2010-03-05	1	0
CE0574	F	1971-04-27	38	1	0	40254	41933	0		1	2010-03-17	1	0
CE0575	M	1955-11-17	54	0	2.2	40266	41786	1	2010-08-19	1	2010-08-19	1	0
CE0579	M	1958-08-25	52	0	1.5	40310	41737	0		1	2010-05-10	1	0
CE0580	M	1984-05-11	25	0	5.2	40294	41709	0		1	2010-04-26	1	0
CE0588	M	1970-12-23	40	0	0	40337	41583	0		1	2010-08-06	1	0
CE0593	M	1977-12-12	33	1	2.8	40350	41828	0		1	2010-11-26	1	0
CE0596	F	1961-06-23	49	0	1.75	40350	41826	0		1	2010-12-23	1	0
CE0598	M	1980-03-30	30	0	4.75	40353	41917	1	2010-07-15	1	2010-07-28	1	0
CE0604	M	1953-03-03	57	0	2.75	40388	41436	0		1	2011-01-26	1	0
CE0608	F	1949-02-09	62	0	5	40399	41858	0		1	2010-11-25	1	0
CE0615	M	1960-06-26	50	0	2.6	40442	41856	0		1	2011-09-02	1	0
CE0621	F	1992-06-30	18	1	4.4	40469	41891	0		1	2010-11-18	1	0
CE0622	M	1972-07-21	38	1	4	40471	41289	0		1	2010-10-20	1	0
CE0623	M	1973-03-21	38	1	0	40473	41581	0		1	2010-12-23	1	0
CE0624	F	1965-09-04	45	0	3.5	40478	40996	0		1	2011-04-29	1	0
CE0626	F	1949-07-04	61	1	0	40479	41905	1	2010-11-30	1	2011-01-26	1	0
CE0627	M	1965-11-28	45	1	3.25	40480	41660	1	2011-06-14	1	2011-06-04	1	0
CE0629	M	1998-06-10	12	0	4.8	40491	40841	0		1	2010-08-12	1	0
CE0631	M	1968-02-25	43	0	3.6	40504	41704	1	2010-12-29	1	2010-12-29	1	0
CE0633	M	1982-10-05	28	1	4	40527	41311	0		1	2011-12-04	1	0
CE0634	M	1965-02-01	45	0	5.2	40549	41672	1	2011-06-07	1	2011-03-21	1	0
CE0640	F	1958-02-03	52	1	1.8	40564	41877	1	2012-01-11	1	2011-02-23	1	0
CE0645	F	1953-10-09	57	1	4.5	40582	41693	0		1	2011-02-24	1	0
CE0647	M	1951-09-08	59	0	2.5	40582	41680	0		1	2011-09-08	1	0
CE0653	F	1967-03-24	44	1	4	40596	41325	1	2011-08-25	1	2011-08-25	1	0
CE0661	M	1999-01-16	12	0	1.2	40648	41792	0		1	2011-10-08	1	0
CE0662	M	1975-10-10	35	1	2.75	40662	41933	0		1	2011-05-17	1	0
CE0667	M	1973-10-06	37	0	4.5	40680	41791	0		1	2011-05-17	1	0
CE0677	M	1972-06-20	39	0	5	40737	41479	1	2011-10-27	1	2011-10-11	1	0
CE0679	M	1948-11-25	62	1	5	40767	41872	0		1	2011-08-09	1	0
CE0682	M	1955-12-30	55	0	4	40781	41919	0		1	2011-11-29	1	0
CE0684	F	1962-08-09	49	0	1.4	40794	41905	1	2011-10-06	1	2012-01-02	1	0
CE0687	M	1986-09-04	25	0	3.25	40820	41919	1	2011-12-06	1	2011-04-10	1	0
AM0006	F	1964-03-24	45	1	0	39164	41358	0		1	2007-03-23	2	0
AM0017	M	1946-01-05	63	1	3.25	39196	40994	1	2011-03-28	1	2007-05-29	2	0
AM0027	F	1999-05-02	8	0	3	39230	41640	0		1	2007-05-25	2	0
AM0038	M	1995-07-27	12	1	0	39296	40770	0		1	2007-02-08	2	0
AM0053	M	1983-11-23	24	0	0	39373	41232	1	2009-09-14	1	2007-10-18	2	0
AM0062	F	1956-02-03	52	1	2	39378	41189	0		1	2008-01-15	2	0
AM0073	M	1959-11-23	48	1	0.75	39419	41330	1	2008-06-02	1	2008-02-26	2	0
AM0086	F	1987-05-24	21	1	4.75	39562	41409	0		1	2008-05-26	2	0
AM0098	M	1977-01-03	31	1	4	39623	41576	0		1	2008-06-24	2	0
AM0108	M	1989-03-04	19	1	5	39706	40561	0		1	2008-09-15	2	0
AM0126	M	1983-06-18	25	0	0.5	39856	41318	0		1	2009-10-02	2	0
AM0132	M	1974-03-26	35	1	0	39874	40986	0		1	2009-02-27	2	0
AM0135	M	1970-10-23	38	0	1.5	39918	41336	0		1	2009-04-20	2	0
AM0152	M	1980-11-06	29	1	0	40129	41711	1	2011-09-20	1	2010-04-28	2	0
AM0156	M	1975-07-28	34	0	4.5	40143	41240	0		1	2009-12-22	2	0
AM0162	M	1981-03-01	28	1	0	40227	41695	0		1	2010-04-29	2	0
AM0164	M	1985-05-08	25	1	2.5	40231	41070	0		1	2010-10-03	2	0
CE0069	M	1988-06-14	19	1	5	39185	41406	0		1	2007-04-13	2	0
CE0081	M	1984-06-07	23	0	5	39198	41849	0		1	2007-05-28	2	0
CE0084	M	1960-11-11	47	1	2	39202	41072	1	2008-04-07	1	2007-04-30	2	0
CE0119	M	1945-11-19	61	1	0.5	39251	41814	1	2008-01-25	1	2007-11-14	2	0
CE0254	M	1981-05-16	26	1	5.5	39394	41155	1	2008-01-09	1	2007-08-11	2	0
CE0260	M	1958-12-26	49	1	0	39396	41961	1	2007-12-05	1	2007-12-19	2	0
CE0296	M	1963-07-04	44	1	0	39492	41673	0		1	2008-02-14	2	0
CE0322	M	1960-10-17	47	0	2.05	39546	41843	0		1	2008-08-04	2	0
CE0386	F	1958-10-02	50	0	6	39755	41883	1	2008-11-24	1	2009-03-27	2	0
CE0412	M	1943-04-06	65	1	3.6	39790	41975	0		1	2009-03-03	2	0
CE0420	M	1980-10-25	28	1	5.25	39811	40603	0		1	2008-12-24	2	0
CE0431	M	1989-02-06	20	0	4.6	39856	41323	0		1	2009-03-16	2	0
CE0442	M	1972-02-21	37	1	5.5	39898	41694	1	2009-10-21	1	2009-06-19	2	0
CE0465	M	1967-04-13	42	1	2.25	40031	41144	0		1	2009-07-20	2	0
CE0500	M	1961-10-16	47	1	5.5	40037	41905	1	2013-07-05	1	2009-12-08	2	0
CE0536	M	1977-05-05	32	1	4.5	40128	42019	1	2015-01-16	1	2009-11-11	2	0
CE0614	M	1950-08-16	60	1	1.6	40444	41926	0		1	2010-09-23	2	0
AM0030	F	1958-04-19	51	0	4	39246	41098	1	2007-12-13	1	2007-06-08	3	0
AM0091	M	1979-07-18	29	1	5.75	39589	41052	0		1	2008-05-19	3	0
AM0124	F	1973-06-18	36	1	1.5	39826	41679	1	2009-03-23	1	2009-01-13	3	0
AM0139	M	1984-05-02	24	1	0.5	39980	40329	1	2009-07-14	1	2009-07-14	3	0
CE0632	M	1985-01-21	26	0	5.6	40505	41926	1	2010-12-16	1	2010-12-21	3	0

## Sheet: baciloscopic examinations
ID	DT SSS examination	BI result
AM0004	2008-03-04	4
AM0004	2009-06-16	4
AM0004	2010-03-04	4
AM0004	2011-04-27	4
AM0004	2012-05-09	4
AM0006	2007-09-04	0
AM0006	2008-03-10	0
AM0006	2009-03-10	0
AM0006	2010-03-09	0
AM0006	2011-03-14	0
AM0006	2012-03-27	0
AM0006	2013-04-04	0
AM0009	2008-06-09	3.25
AM0009	2010-01-11	3.25
AM0009	2010-10-25	3.25
AM0009	2011-11-03	3.25
AM0011	2008-03-26	1.25
AM0011	2008-09-14	1.25
AM0011	2010-03-30	1.25
AM0011	2011-03-28	1.25
AM0011	2012-04-04	1.25
AM0011	2013-03-25	1.25
AM0014	2008-04-03	4.5
AM0014	2009-05-04	4.5
AM0014	2010-04-07	4.5
AM0014	2011-02-04	4.5
AM0014	2012-04-26	4.5
AM0014	2013-06-27	4.5
AM0017	2009-03-31	3.25
AM0017	2009-09-28	3.25
AM0017	2010-03-30	3.25
AM0017	2011-03-28	3.25
AM0017	2012-03-27	3.25
AM0020	2008-06-12	4
AM0020	2009-08-11	4
AM0020	2010-04-23	4
AM0020	2011-08-31	4
AM0020	2012-07-05	4
AM0022	2008-04-17	4
AM0022	2009-04-16	4
AM0022	2010-04-16	4
AM0022	2011-04-13	4
AM0022	2012-04-12	4
AM0022	2013-04-30	4
AM0025	2008-04-28	3.5
AM0025	2009-04-16	3.5
AM0025	2010-06-02	3.5
AM0025	2012-11-30	3.5
AM0027	2008-05-06	3
AM0027	2009-05-14	3
AM0030	2008-06-03	4
AM0030	2009-06-04	4
AM0030	2010-06-01	4
AM0030	2011-06-20	4
AM0030	2012-07-13	4
AM0032	2008-06-03	3
AM0032	2009-06-02	3
AM0032	2010-06-09	3
AM0034	2008-07-21	2.5
AM0034	2009-09-12	2.5
AM0034	2010-10-01	2.5
AM0034	2011-07-18	2.5
AM0034	2012-09-13	2.5
AM0034	2013-09-03	2.5
AM0038	2009-09-30	0
AM0042	2008-07-21	2.5
AM0042	2009-07-21	2.5
AM0042	2010-07-20	2.5
AM0042	2011-07-25	2.5
AM0042	2012-07-24	2.5
AM0042	2014-09-15	2.5
AM0047	2008-08-21	2
AM0047	2009-08-20	2
AM0050	2008-09-18	3.25
AM0050	2009-09-14	3.25
AM0050	2011-02-09	3.25
AM0050	2011-08-11	3.25
AM0053	2008-09-08	0
AM0053	2009-09-14	0
AM0053	2010-10-14	0
AM0053	2011-09-12	0
AM0053	2012-08-15	0
AM0058	2008-09-21	2.75
AM0058	2009-09-23	2.75
AM0058	2010-09-24	2.75
AM0058	2011-09-21	2.75
AM0062	2008-10-20	2
AM0062	2009-10-20	2
AM0062	2010-11-08	2
AM0062	2011-10-04	2
AM0062	2012-10-09	2
AM0062	2013-10-23	2
AM0063	2009-01-09	0
AM0063	2009-12-14	0
AM0063	2010-07-22	0
AM0063	2012-09-26	0
AM0073	2009-01-05	0.75
AM0073	2010-01-12	0.75
AM0073	2011-03-21	0.75
AM0073	2012-01-18	0.75
AM0074	2008-12-16	2.75
AM0074	2010-02-09	2.75
AM0074	2010-12-01	2.75
AM0074	2011-12-05	2.75
AM0074	2012-12-12	2.75
AM0074	2013-12-10	2.75
AM0078	2009-02-12	4.25
AM0078	2010-03-09	4.25
AM0078	2011-03-14	4.25
AM0078	2012-06-13	4.25
AM0078	2013-02-15	4.25
AM0079	2009-01-05	5.5
AM0079	2010-03-08	5.5
AM0079	2011-03-28	5.5
AM0079	2012-03-23	5.5
AM0079	2013-04-02	5.5
AM0082	2009-02-19	0
AM0082	2010-02-18	0
AM0082	2011-02-21	0
AM0082	2012-02-14	0
AM0083	2009-03-03	5.5
AM0083	2010-03-03	5.5
AM0085	2009-08-18	3
AM0085	2010-11-26	3
AM0085	2011-07-13	3
AM0086	2009-09-29	4.75
AM0086	2010-06-08	4.75
AM0086	2011-07-13	4.75
AM0086	2012-08-20	4.75
AM0086	2013-05-16	4.75
AM0087	2008-04-22	2.25
AM0087	2009-04-24	2.25
AM0087	2010-06-01	2.25
AM0087	2013-12-19	2.25
AM0088	2009-10-05	0
AM0089	2009-09-28	5
AM0091	2009-05-19	5.75
AM0091	2010-03-23	5.75
AM0091	2011-05-09	5.75
AM0091	2012-05-24	5.75
AM0092	2009-05-04	4.25
AM0092	2010-05-14	4.25
AM0092	2011-05-17	4.25
AM0092	2012-02-14	4.25
AM0092	2013-05-16	4.25
AM0092	2014-05-06	4.25
AM0093	2009-06-17	1.75
AM0094	2009-06-22	3.25
AM0094	2009-12-31	3.25
AM0094	2009-12-31	3.25
AM0094	2012-08-16	3.25
AM0095	2009-05-12	3.5
AM0095	2010-06-28	3.5
AM0095	2011-06-22	3.5
AM0095	2012-06-05	3.5
AM0095	2013-04-09	3.5
AM0096	2014-05-15	0
AM0097	2009-10-20	0
AM0097	2012-08-02	0
AM0098	2009-09-09	4
AM0098	2010-12-16	4
AM0098	2012-09-03	4
AM0098	2013-10-31	4
AM0099	2009-09-15	0
AM0099	2012-09-24	0
AM0099	2013-09-19	0
AM0101	2009-07-14	2
AM0101	2010-07-13	2
AM0101	2011-07-04	2
AM0101	2012-07-03	2
AM0101	2013-07-01	2
AM0101	2014-07-08	2
AM0102	2009-08-06	2
AM0102	2010-08-10	2
AM0104	2009-09-24	4.5
AM0104	2010-10-01	4.5
AM0104	2011-09-12	4.5
AM0104	2012-08-01	4.5
AM0108	2009-09-16	5
AM0108	2011-02-18	5
AM0111	2009-11-17	1.75
AM0112	2009-09-22	5.5
AM0112	2011-04-15	5.5
AM0112	2012-07-11	5.5
AM0112	2013-09-24	5.5
AM0113	2008-10-20	1.25
AM0114	2009-11-05	4
AM0114	2010-12-01	4
AM0114	2011-11-04	4
AM0114	2012-10-18	4
AM0114	2013-11-19	4
AM0115	2009-12-16	3.5
AM0115	2011-03-17	3.5
AM0115	2012-07-26	3.5
AM0120	2009-05-28	0
AM0120	2009-12-31	0
AM0120	2010-12-27	0
AM0120	2012-01-20	0
AM0120	2012-12-19	0
AM0120	2014-04-14	0
AM0121	2009-12-21	3.25
AM0121	2010-12-21	3.25
AM0121	2011-12-19	3.25
AM0121	2013-02-04	3.25
AM0121	2014-05-16	3.25
AM0122	2009-12-03	0
AM0122	2010-12-02	0
AM0122	2011-12-05	0
AM0122	2012-12-04	0
AM0122	2013-12-12	0
AM0124	2010-01-11	1.5
AM0124	2011-02-28	1.5
AM0124	2012-02-06	1.5
AM0124	2013-02-05	1.5
AM0124	2014-02-10	1.5
AM0125	2010-01-14	5
AM0125	2011-01-06	5
AM0125	2012-05-21	5
AM0125	2013-02-07	5
AM0125	2014-08-12	5
AM0126	2010-02-02	0.5
AM0126	2011-02-04	0.5
AM0126	2012-02-03	0.5
AM0126	2013-02-14	0.5
AM0127	2010-02-22	3.75
AM0127	2011-03-14	3.75
AM0127	2012-03-23	3.75
AM0127	2013-03-04	3.75
AM0127	2014-05-12	3.75
AM0128	2010-04-06	3.5
AM0128	2011-10-17	3.5
AM0130	2010-02-05	4
AM0130	2011-02-18	4
AM0130	2012-02-14	4
AM0130	2013-04-23	4
AM0130	2014-06-26	4
AM0131	2010-02-10	1.5
AM0131	2011-03-29	1.5
AM0131	2012-12-18	1.5
AM0132	2010-03-09	0
AM0132	2011-08-19	0
AM0132	2012-03-19	0
AM0134	2009-12-31	0
AM0134	2010-03-10	0
AM0134	2012-08-14	0
AM0134	2013-03-15	0
AM0135	2010-03-24	1.5
AM0135	2011-05-17	1.5
AM0135	2012-03-05	1.5
AM0135	2013-03-04	1.5
AM0136	2010-04-20	0
AM0136	2011-04-18	0
AM0136	2012-04-16	0
AM0136	2013-04-16	0
AM0136	2014-04-22	0
AM0137	2010-05-20	3.5
AM0137	2011-03-14	3.5
AM0138	2010-03-24	3.25
AM0139	2010-06-01	0.5
AM0140	2009-12-31	0
AM0140	2011-06-01	0
AM0140	2012-07-31	0
AM0143	2010-06-16	0
AM0143	2012-05-24	0
AM0144	2010-06-30	1
AM0144	2011-06-14	1
AM0144	2012-05-17	1
AM0145	2010-06-28	4
AM0145	2011-04-15	4
AM0145	2012-06-25	4
AM0145	2013-07-04	4
AM0145	2014-07-01	4
AM0147	2011-09-18	1.5
AM0147	2012-10-23	1.5
AM0147	2013-08-20	1.5
AM0147	2014-06-05	1.5
AM0148	2010-09-27	3.75
AM0148	2011-09-15	3.75
AM0148	2013-05-28	3.75
AM0149	2010-11-30	3
AM0149	2012-12-01	3
AM0150	2010-11-24	0
AM0151	2010-05-03	3.5
AM0151	2011-11-08	3.5
AM0151	2012-08-23	3.5
AM0151	2013-11-05	3.5
AM0152	2011-01-14	0
AM0152	2012-10-17	0
AM0152	2013-06-17	0
AM0155	2010-12-27	5.5
AM0155	2011-11-29	5.5
AM0155	2013-03-12	5.5
AM0155	2013-11-08	5.5
AM0156	2010-11-03	4.5
AM0156	2011-06-15	4.5
AM0156	2011-12-28	4.5
AM0156	2012-11-28	4.5
AM0157	2010-11-12	0
AM0157	2011-12-13	0
AM0157	2012-11-13	0
AM0157	2014-03-14	0
AM0161	2011-01-13	3
AM0161	2012-01-10	3
AM0162	2011-02-23	0
AM0162	2012-02-27	0
AM0162	2013-02-06	0
AM0162	2014-02-27	0
AM0163	2011-02-08	1
AM0163	2011-12-27	1
AM0163	2013-02-14	1
AM0163	2014-03-14	1
AM0164	2011-06-14	2.5
AM0164	2012-06-12	2.5
AM0166	2011-04-28	3.25
AM0166	2012-06-17	3.25
AM0166	2013-06-17	3.25
AM0166	2014-09-02	3.25
AM0167	2011-08-30	1
AM0167	2012-01-03	1
AM0167	2013-04-08	1
AM0168	2011-03-22	1.25
AM0168	2012-07-09	1.25
AM0168	2013-01-23	1.25
AM0171	2011-05-20	2.25
AM0172	2011-06-13	4.5
AM0175	2011-07-12	2.75
AM0175	2012-10-08	2.75
AM0175	2013-02-14	2.75
AM0176	2011-11-11	2.6
AM0176	2012-06-12	2.6
AM0176	2014-05-20	2.6
CE0015	2007-11-16	0
CE0015	2009-03-18	0
CE0019	2008-01-07	3.25
CE0019	2009-02-18	3.25
CE0019	2010-04-07	3.25
CE0019	2011-07-25	3.25
CE0019	2012-03-05	3.25
CE0020	2008-02-18	4.25
CE0020	2010-03-24	4.25
CE0020	2012-12-21	4.25
CE0020	2014-03-12	4.25
CE0023	2007-08-20	5.25
CE0023	2012-03-16	5.25
CE0026	2007-08-22	0
CE0026	2007-09-03	0
CE0026	2013-08-02	0
CE0027	2007-12-27	0
CE0027	2007-11-09	0
CE0027	2008-02-18	0
CE0027	2011-08-25	0
CE0029	2007-11-16	0
CE0031	2008-04-24	4.25
CE0031	2013-08-01	4.25
CE0031	2014-09-16	4.25
CE0032	2012-06-13	0
CE0033	2007-09-25	0
CE0035	2007-10-10	0
CE0037	2008-02-20	0
CE0038	2008-01-25	0.4
CE0038	2009-03-02	0.4
CE0039	2008-02-20	5.5
CE0039	2009-03-02	5.5
CE0043	2007-09-06	3.75
CE0043	2009-03-24	3.75
CE0043	2014-03-10	3.75
CE0044	2008-03-17	5.5
CE0044	2009-03-18	5.5
CE0046	2007-10-29	0
CE0049	2008-02-01	0.66
CE0049	2010-03-05	0.66
CE0049	2012-03-05	0.66
CE0052	2008-02-14	2.26
CE0052	2009-04-30	2.26
CE0052	2010-05-07	2.26
CE0052	2011-05-05	2.26
CE0054	2008-02-20	0
CE0054	2010-08-18	0
CE0056	2007-10-02	2
CE0056	2010-06-14	2
CE0066	2007-09-09	0
CE0067	2012-12-04	0
CE0069	2007-10-23	5
CE0069	2010-09-30	5
CE0069	2011-09-02	5
CE0069	2013-05-13	5
CE0070	2008-07-23	1
CE0070	2011-08-19	1
CE0071	2008-04-11	1.5
CE0071	2009-05-18	1.5
CE0071	2010-05-18	1.5
CE0073	2007-12-20	4
CE0073	2012-12-11	4
CE0074	2007-10-25	0
CE0074	2007-10-16	0
CE0077	2007-10-17	3.25
CE0077	2011-05-05	3.25
CE0077	2012-07-26	3.25
CE0077	2013-05-06	3.25
CE0078	2009-05-18	0
CE0079	2013-04-17	0
CE0081	2008-05-30	5
CE0081	2011-03-10	5
CE0081	2013-06-18	5
CE0081	2014-07-30	5
CE0083	2008-07-07	4.8
CE0083	2012-11-20	4.8
CE0084	2008-03-10	2
CE0084	2009-03-09	2
CE0084	2012-06-13	2
CE0085	2011-08-26	0
CE0086	2008-05-26	0
CE0086	2009-05-26	0
CE0086	2010-09-21	0
CE0086	2011-05-31	0
CE0087	2007-11-27	0
CE0087	2008-06-12	0
CE0087	2009-09-18	0
CE0088	2013-04-15	0
CE0089	2007-11-07	3.25
CE0089	2012-06-18	3.25
CE0091	2008-08-07	0
CE0091	2011-09-21	0
CE0094	2008-08-14	3.8
CE0095	2008-05-09	0
CE0101	2008-06-19	3.25
CE0101	2009-06-18	3.25
CE0101	2012-12-06	3.25
CE0103	2009-05-18	4.6
CE0103	2010-05-25	4.6
CE0103	2012-03-08	4.6
CE0104	2007-11-14	0
CE0105	2008-07-02	4
CE0105	2010-06-07	4
CE0110	2009-05-05	4.4
CE0110	2011-08-31	4.4
CE0110	2012-12-10	4.4
CE0111	2012-10-23	0
CE0112	2008-05-23	2.8
CE0112	2011-09-09	2.8
CE0112	2012-05-08	2.8
CE0112	2013-02-06	2.8
CE0112	2014-05-12	2.8
CE0113	2012-11-05	2.8
CE0114	2008-05-16	4
CE0114	2013-02-22	4
CE0114	2014-02-19	4
CE0115	2008-06-23	2
CE0115	2009-07-07	2
CE0115	2010-08-11	2
CE0115	2011-08-11	2
CE0115	2013-06-03	2
CE0117	2008-06-09	0
CE0118	2008-05-13	3
CE0118	2010-10-26	3
CE0118	2012-11-01	3
CE0119	2012-08-16	0.5
CE0121	2009-11-06	0
CE0121	2012-07-04	0
CE0122	2013-08-08	0
CE0124	2007-12-12	0
CE0124	2008-07-09	0
CE0126	2010-06-21	4
CE0126	2011-07-11	4
CE0126	2013-05-29	4
CE0127	2009-05-18	3.5
CE0128	2007-11-21	0
CE0130	2014-03-31	0
CE0134	2008-07-02	0
CE0134	2011-09-01	0
CE0136	2014-03-12	2
CE0137	2012-10-11	5
CE0138	2008-08-11	4
CE0138	2012-08-24	4
CE0138	2013-08-29	4
CE0139	2008-06-24	2.25
CE0139	2012-09-16	2.25
CE0142	2008-07-03	5
CE0142	2009-06-24	5
CE0142	2010-08-26	5
CE0142	2011-08-17	5
CE0144	2008-07-31	1
CE0144	2011-07-18	1
CE0145	2013-12-09	5
CE0146	2008-01-21	4
CE0146	2013-03-11	4
CE0149	2008-08-19	4.75
CE0150	2009-09-15	0
CE0151	2008-07-17	5
CE0151	2010-08-05	5
CE0151	2011-08-04	5
CE0151	2013-01-25	5
CE0157	2008-08-22	2.4
CE0157	2012-07-10	2.4
CE0159	2008-07-16	4.25
CE0159	2009-08-12	4.25
CE0159	2010-09-15	4.25
CE0159	2011-07-22	4.25
CE0159	2012-07-18	4.25
CE0160	2008-07-14	0
CE0162	2008-09-02	4
CE0162	2011-09-02	4
CE0164	2008-08-04	5
CE0164	2011-03-24	5
CE0166	2008-06-21	2.5
CE0166	2011-08-31	2.5
CE0170	2008-08-07	5
CE0170	2009-09-24	5
CE0170	2011-09-15	5
CE0170	2012-08-07	5
CE0170	2013-08-29	5
CE0170	2014-08-04	5
CE0171	2008-10-08	3.8
CE0171	2009-10-07	3.8
CE0171	2012-02-08	3.8
CE0172	2008-10-17	3
CE0172	2010-10-26	3
CE0174	2013-05-28	0
CE0175	2009-11-09	3.8
CE0178	2008-08-04	0
CE0178	2010-10-04	0
CE0178	2011-10-04	0
CE0180	2008-10-20	4.05
CE0180	2013-01-28	4.05
CE0180	2013-09-19	4.05
CE0182	2008-09-03	3.25
CE0182	2010-01-06	3.25
CE0182	2011-04-06	3.25
CE0183	2008-08-07	1.5
CE0183	2013-03-11	1.5
CE0184	2008-10-22	2.6
CE0184	2011-10-04	2.6
CE0184	2012-10-03	2.6
CE0185	2008-09-21	5.25
CE0185	2011-09-09	5.25
CE0185	2012-09-14	5.25
CE0185	2013-11-12	5.25
CE0188	2008-12-16	3.5
CE0188	2014-07-11	3.5
CE0189	2008-09-30	5.6
CE0189	2009-09-30	5.6
CE0189	2010-10-18	5.6
CE0189	2012-10-09	5.6
CE0191	2008-10-06	5.25
CE0191	2009-10-06	5.25
CE0191	2011-11-18	5.25
CE0191	2013-01-30	5.25
CE0191	2013-06-05	5.25
CE0193	2008-09-11	0
CE0193	2010-09-10	0
CE0194	2010-09-29	0
CE0197	2008-12-01	4
CE0197	2012-07-31	4
CE0199	2008-10-09	5
CE0199	2014-12-03	5
CE0200	2008-08-12	0
CE0201	2010-09-08	4
CE0204	2008-10-06	5
CE0204	2012-07-04	5
CE0205	2010-09-15	4.75
CE0205	2012-02-15	4.75
CE0207	2008-08-25	3.75
CE0207	2009-12-04	3.75
CE0207	2012-03-24	3.75
CE0208	2008-11-20	4.75
CE0208	2011-09-15	4.75
CE0208	2013-09-17	4.75
CE0208	2014-10-07	4.75
CE0211	2008-10-06	1.8
CE0211	2009-10-06	1.8
CE0211	2011-12-12	1.8
CE0211	2012-07-18	1.8
CE0212	2008-09-03	2.75
CE0212	2012-07-31	2.75
CE0215	2009-01-26	0
CE0217	2008-10-01	0.75
CE0217	2009-03-18	0.75
CE0217	2010-10-06	0.75
CE0217	2011-08-10	0.75
CE0219	2008-09-02	2.25
CE0219	2009-10-27	2.25
CE0220	2008-10-01	4.75
CE0220	2009-04-14	4.75
CE0220	2010-10-04	4.75
CE0220	2011-12-19	4.75
CE0220	2012-10-19	4.75
CE0221	2008-12-25	0
CE0221	2011-08-11	0
CE0223	2008-09-11	0.2
CE0223	2009-10-09	0.2
CE0223	2012-12-12	0.2
CE0225	2008-08-25	2.75
CE0225	2009-09-16	2.75
CE0229	2008-11-20	4
CE0229	2012-01-08	4
CE0229	2013-11-26	4
CE0230	2008-12-01	3.5
CE0231	2014-08-13	0
CE0232	2009-01-25	1
CE0232	2009-11-25	1
CE0232	2011-02-09	1
CE0232	2013-12-04	1
CE0234	2010-11-17	0
CE0238	2008-10-21	3.4
CE0238	2011-10-10	3.4
CE0240	2008-10-07	0.25
CE0242	2012-07-04	4.4
CE0242	2013-10-01	4.4
CE0244	2010-06-24	0
CE0247	2008-10-15	2.6
CE0247	2009-11-18	2.6
CE0248	2008-11-11	2.2
CE0249	2008-10-20	3.75
CE0249	2009-09-23	3.75
CE0249	2010-09-08	3.75
CE0249	2012-09-06	3.75
CE0251	2009-03-05	4.25
CE0251	2012-10-16	4.25
CE0254	2008-11-21	5.5
CE0254	2011-10-11	5.5
CE0256	2008-11-14	0
CE0256	2010-02-10	0
CE0256	2011-02-10	0
CE0257	2008-12-10	5
CE0257	2009-12-10	5
CE0257	2010-11-05	5
CE0257	2012-03-02	5
CE0259	2008-12-09	6
CE0259	2011-05-06	6
CE0259	2012-03-30	6
CE0259	2013-02-08	6
CE0259	2013-09-12	6
CE0259	2014-10-15	6
CE0260	2008-12-08	0
CE0260	2009-11-12	0
CE0265	2010-12-20	0
CE0266	2008-10-29	0
CE0267	2008-10-29	4.5
CE0267	2009-11-04	4.5
CE0267	2010-11-03	4.5
CE0267	2012-10-31	4.5
CE0267	2013-11-08	4.5
CE0268	2009-11-20	0
CE0268	2012-06-14	0
CE0270	2009-01-16	3.5
CE0270	2010-01-22	3.5
CE0270	2011-01-11	3.5
CE0274	2008-12-05	3.8
CE0274	2010-01-20	3.8
CE0274	2010-11-17	3.8
CE0274	2014-04-02	3.8
CE0276	2008-12-10	5
CE0276	2012-03-04	5
CE0276	2014-05-15	5
CE0278	2014-08-21	0
CE0279	2008-11-07	0
CE0281	2008-12-11	4.8
CE0282	2010-02-03	4
CE0282	2011-03-22	4
CE0282	2012-04-13	4
CE0284	2009-01-13	4.75
CE0284	2011-09-14	4.75
CE0284	2012-03-06	4.75
CE0284	2013-04-02	4.75
CE0284	2014-09-19	4.75
CE0287	2008-12-16	5
CE0288	2008-12-10	0
CE0288	2010-01-18	0
CE0288	2011-01-11	0
CE0288	2012-01-11	0
CE0289	2009-01-30	2.2
CE0289	2010-02-11	2.2
CE0293	2009-02-05	1.25
CE0293	2014-12-17	1.25
CE0294	2009-01-12	1.75
CE0294	2010-05-24	1.75
CE0294	2013-02-05	1.75
CE0295	2009-02-06	1.06
CE0295	2011-12-09	1.06
CE0296	2009-02-12	0
CE0296	2010-02-19	0
CE0299	2009-03-24	1.75
CE0300	2014-09-08	0
CE0302	2009-02-09	3
CE0305	2009-01-14	0
CE0306	2013-04-10	0
CE0307	2009-02-05	0
CE0307	2010-03-23	0
CE0307	2011-03-23	0
CE0307	2012-06-05	0
CE0309	2009-02-04	5
CE0309	2010-03-17	5
CE0309	2012-02-29	5
CE0309	2013-02-05	5
CE0309	2014-03-12	5
CE0310	2009-03-27	0
CE0310	2010-03-26	0
CE0311	2009-02-10	0
CE0312	2009-02-19	0
CE0313	2009-01-29	1.4
CE0313	2010-02-26	1.4
CE0314	2009-05-04	5
CE0314	2010-07-06	5
CE0314	2011-08-26	5
CE0314	2012-08-28	5
CE0314	2013-07-22	5
CE0314	2014-08-21	5
CE0315	2009-04-02	3.4
CE0315	2010-04-05	3.4
CE0315	2011-04-05	3.4
CE0315	2012-05-24	3.4
CE0315	2013-04-09	3.4
CE0320	2009-04-22	0.1
CE0320	2013-03-21	0.1
CE0322	2009-03-05	2.05
CE0322	2010-05-14	2.05
CE0322	2011-09-16	2.05
CE0322	2012-12-04	2.05
CE0322	2014-07-24	2.05
CE0323	2014-05-07	0
CE0325	2009-06-15	0.75
CE0325	2013-04-08	0.75
CE0327	2009-04-08	3.4
CE0327	2010-05-11	3.4
CE0327	2012-05-10	3.4
CE0328	2009-03-27	0
CE0329	2009-04-03	3.75
CE0329	2012-03-20	3.75
CE0329	2013-05-21	3.75
CE0330	2013-06-12	4.75
CE0331	2010-05-21	0
CE0332	2009-05-06	5.2
CE0334	2010-04-07	3.8
CE0336	2009-04-07	5
CE0337	2009-04-03	4
CE0337	2010-05-27	4
CE0337	2011-05-24	4
CE0337	2012-06-14	4
CE0337	2013-06-04	4
CE0338	2009-04-08	4.25
CE0338	2012-10-03	4.25
CE0338	2013-06-06	4.25
CE0338	2014-06-10	4.25
CE0339	2009-03-23	4
CE0339	2010-04-25	4
CE0339	2012-01-09	4
CE0339	2013-07-03	4
CE0339	2014-05-08	4
CE0340	2009-05-04	4.6
CE0340	2010-05-07	4.6
CE0340	2011-05-10	4.6
CE0342	2012-08-01	5.2
CE0343	2009-04-14	0
CE0344	2009-05-05	0
CE0345	2009-11-09	0
CE0346	2011-06-08	1.75
CE0347	2009-05-07	4.5
CE0347	2010-05-04	4.5
CE0347	2012-05-16	4.5
CE0347	2013-07-24	4.5
CE0347	2014-06-04	4.5
CE0350	2009-02-09	0.5
CE0350	2013-11-06	0.5
CE0351	2009-04-24	0
CE0351	2010-05-21	0
CE0352	2009-06-16	4.8
CE0352	2012-03-05	4.8
CE0352	2013-04-18	4.8
CE0353	2010-08-11	4
CE0353	2011-11-03	4
CE0353	2012-06-27	4
CE0353	2013-07-17	4
CE0353	2014-08-05	4
CE0354	2009-06-09	4.5
CE0354	2010-07-06	4.5
CE0356	2014-05-29	0
CE0358	2010-02-12	5
CE0358	2011-09-02	5
CE0358	2012-08-08	5
CE0358	2013-08-12	5
CE0358	2014-10-08	5
CE0362	2009-06-15	0
CE0363	2009-06-25	4.75
CE0363	2010-12-02	4.75
CE0363	2012-03-28	4.75
CE0363	2013-02-25	4.75
CE0363	2014-05-28	4.75
CE0365	2010-03-30	5
CE0365	2011-09-27	5
CE0365	2012-05-30	5
CE0365	2013-10-25	5
CE0365	2014-09-30	5
CE0366	2009-08-03	0.06
CE0366	2010-08-20	0.06
CE0366	2011-09-21	0.06
CE0367	2009-07-10	5
CE0367	2010-08-12	5
CE0367	2012-06-26	5
CE0368	2009-08-11	5
CE0368	2010-08-31	5
CE0369	2012-04-02	0
CE0370	2009-08-31	2.75
CE0370	2011-08-19	2.75
CE0370	2014-02-21	2.75
CE0371	2009-09-02	0.5
CE0371	2011-02-16	0.5
CE0371	2014-10-29	0.5
CE0372	2009-11-25	5.75
CE0372	2011-12-05	5.75
CE0372	2013-01-22	5.75
CE0372	2013-10-17	5.75
CE0373	2009-11-19	1.4
CE0373	2012-06-28	1.4
CE0374	2009-09-04	3.25
CE0374	2010-10-18	3.25
CE0375	2009-10-29	0
CE0375	2010-10-18	0
CE0375	2011-10-04	0
CE0375	2012-12-21	0
CE0375	2014-08-20	0
CE0376	2010-04-14	1
CE0376	2013-04-23	1
CE0377	2009-08-18	4.75
CE0377	2010-11-11	4.75
CE0378	2009-09-02	5.75
CE0378	2012-12-04	5.75
CE0378	2014-05-21	5.75
CE0379	2009-10-13	0
CE0379	2011-09-13	0
CE0380	2009-09-16	3.6
CE0383	2009-09-18	4.8
CE0383	2010-10-04	4.8
CE0383	2011-08-16	4.8
CE0384	2009-09-17	4.75
CE0384	2010-10-20	4.75
CE0384	2011-11-10	4.75
CE0384	2012-11-12	4.75
CE0384	2013-10-09	4.75
CE0385	2010-12-01	5.75
CE0385	2012-02-07	5.75
CE0385	2013-04-12	5.75
CE0385	2013-11-18	5.75
CE0385	2014-03-12	5.75
CE0386	2009-10-30	6
CE0386	2010-12-17	6
CE0386	2013-03-15	6
CE0387	2009-10-07	1.5
CE0387	2012-10-03	1.5
CE0389	2010-03-30	4.5
CE0389	2011-09-14	4.5
CE0389	2012-12-12	4.5
CE0390	2009-12-15	6
CE0390	2011-01-17	6
CE0391	2009-10-14	2
CE0391	2010-11-30	2
CE0391	2011-09-19	2
CE0391	2012-07-15	2
CE0391	2013-10-17	2
CE0392	2010-11-29	4.2
CE0392	2011-11-23	4.2
CE0392	2012-11-22	4.2
CE0392	2013-11-05	4.2
CE0393	2014-02-06	0
CE0395	2014-08-13	0
CE0396	2010-01-08	5.25
CE0396	2011-02-23	5.25
CE0396	2012-10-17	5.25
CE0396	2013-03-11	5.25
CE0397	2009-10-09	4.2
CE0397	2010-11-17	4.2
CE0398	2009-11-30	4
CE0398	2010-11-22	4
CE0399	2009-11-24	5
CE0399	2010-11-09	5
CE0399	2012-01-17	5
CE0399	2012-11-06	5
CE0399	2013-11-14	5
CE0399	2014-10-22	5
CE0401	2011-09-21	4.5
CE0402	2009-10-23	4.8
CE0402	2012-08-13	4.8
CE0404	2010-09-15	5.2
CE0404	2012-08-22	5.2
CE0404	2013-11-06	5.2
CE0405	2011-02-01	1.4
CE0405	2012-02-29	1.4
CE0405	2013-03-25	1.4
CE0407	2009-11-16	2.4
CE0407	2014-01-06	2.4
CE0409	2012-02-10	0
CE0410	2010-01-15	6
CE0410	2012-02-23	6
CE0410	2013-03-20	6
CE0410	2014-07-18	6
CE0411	2009-11-27	3.75
CE0411	2010-12-07	3.75
CE0411	2011-12-07	3.75
CE0412	2009-11-11	3.6
CE0412	2011-12-07	3.6
CE0412	2013-07-17	3.6
CE0412	2014-12-03	3.6
CE0414	2009-11-30	1.5
CE0414	2011-04-08	1.5
CE0414	2012-06-25	1.5
CE0415	2009-11-04	5.4
CE0415	2010-12-01	5.4
CE0415	2012-12-19	5.4
CE0417	2010-01-11	2.2
CE0417	2012-05-09	2.2
CE0417	2013-01-08	2.2
CE0417	2014-01-28	2.2
CE0418	2009-12-31	0
CE0419	2009-12-23	5.5
CE0419	2011-07-29	5.5
CE0419	2012-11-28	5.5
CE0420	2010-01-06	5.25
CE0421	2009-12-14	0
CE0421	2011-02-11	0
CE0422	2010-03-23	0
CE0422	2012-03-07	0
CE0423	2009-12-14	3
CE0423	2011-01-13	3
CE0423	2012-02-16	3
CE0424	2010-12-23	2.2
CE0424	2011-11-03	2.2
CE0425	2010-01-10	0
CE0426	2010-01-21	1.2
CE0426	2013-08-22	1.2
CE0427	2010-02-04	0
CE0427	2011-03-31	0
CE0427	2012-03-30	0
CE0428	2012-03-12	5.5
CE0429	2010-01-08	3.8
CE0429	2011-05-03	3.8
CE0429	2012-12-14	3.8
CE0430	2010-01-19	2.5
CE0430	2011-07-28	2.5
CE0430	2014-05-07	2.5
CE0431	2010-01-08	4.6
CE0431	2011-06-17	4.6
CE0431	2012-10-09	4.6
CE0432	2010-01-12	5
CE0432	2011-11-22	5
CE0432	2013-02-19	5
CE0432	2014-04-02	5
CE0433	2010-02-18	0
CE0433	2011-02-07	0
CE0434	2014-05-08	0
CE0436	2009-02-16	0.6
CE0436	2011-03-03	0.6
CE0436	2012-05-02	0.6
CE0437	2010-02-25	2.75
CE0437	2011-04-05	2.75
CE0437	2013-02-26	2.75
CE0438	2011-08-22	1
CE0439	2010-04-29	6
CE0439	2011-11-21	6
CE0439	2012-04-04	6
CE0439	2013-06-05	6
CE0440	2010-03-02	0
CE0441	2010-03-04	4.75
CE0441	2012-10-22	4.75
CE0442	2010-03-29	5.5
CE0442	2011-03-03	5.5
CE0442	2012-08-20	5.5
CE0442	2013-07-08	5.5
CE0442	2014-02-25	5.5
CE0444	2012-12-17	4.4
CE0444	2014-05-14	4.4
CE0445	2009-01-21	0.4
CE0445	2010-06-02	0.4
CE0445	2011-06-01	0.4
CE0446	2010-03-16	0
CE0446	2011-03-01	0
CE0446	2012-03-02	0
CE0447	2010-02-19	0
CE0449	2010-04-16	1.8
CE0449	2011-07-26	1.8
CE0449	2012-10-17	1.8
CE0451	2009-04-08	3.75
CE0451	2010-03-10	3.75
CE0451	2011-04-20	3.75
CE0451	2014-04-09	3.75
CE0452	2013-06-14	0
CE0453	2010-04-27	5
CE0453	2012-07-25	5
CE0453	2013-07-24	5
CE0454	2010-03-10	1.5
CE0454	2012-04-27	1.5
CE0455	2010-03-31	4.4
CE0456	2010-04-12	3.75
CE0456	2012-05-25	3.75
CE0457	2010-04-05	5
CE0457	2011-04-08	5
CE0457	2012-04-10	5
CE0459	2010-03-18	0
CE0459	2011-05-12	0
CE0460	2010-04-07	4
CE0461	2010-03-31	3.5
CE0461	2014-10-29	3.5
CE0464	2011-08-10	3.8
CE0465	2010-05-19	2.25
CE0465	2011-05-19	2.25
CE0466	2010-05-31	4.6
CE0466	2011-05-30	4.6
CE0466	2012-05-17	4.6
CE0467	2010-10-27	4.4
CE0467	2011-11-04	4.4
CE0469	2010-03-27	3.2
CE0469	2011-05-31	3.2
CE0470	2010-05-28	3.75
CE0470	2012-04-23	3.75
CE0470	2014-02-21	3.75
CE0471	2010-04-30	1.75
CE0471	2011-06-01	1.75
CE0471	2012-06-12	1.75
CE0472	2010-11-03	2.75
CE0473	2010-04-22	0
CE0474	2010-05-26	5
CE0474	2011-06-02	5
CE0474	2012-05-09	5
CE0474	2013-05-15	5
CE0475	2013-04-09	5
CE0475	2014-03-28	5
CE0476	2010-04-08	3.8
CE0476	2011-11-22	3.8
CE0477	2010-07-05	5.2
CE0477	2011-09-01	5.2
CE0477	2012-10-31	5.2
CE0477	2013-04-29	5.2
CE0477	2013-08-01	5.2
CE0477	2014-05-07	5.2
CE0480	2011-08-26	0
CE0480	2012-05-03	0
CE0481	2012-02-03	2.2
CE0482	2010-10-25	5
CE0482	2014-01-22	5
CE0482	2014-05-09	5
CE0483	2010-05-03	4.75
CE0483	2011-07-07	4.75
CE0483	2012-06-05	4.75
CE0483	2014-04-24	4.75
CE0484	2010-04-29	0
CE0484	2011-05-27	0
CE0485	2012-04-17	2
CE0485	2013-03-13	2
CE0486	2010-07-07	1.8
CE0486	2011-11-22	1.8
CE0486	2012-11-22	1.8
CE0487	2012-03-05	1
CE0488	2010-06-29	5.8
CE0489	2010-06-11	4.4
CE0489	2013-09-24	4.4
CE0490	2010-08-02	4
CE0490	2012-10-16	4
CE0490	2013-10-23	4
CE0491	2010-05-22	4
CE0491	2011-07-21	4
CE0492	2010-07-15	0.5
CE0492	2011-07-15	0.5
CE0493	2010-07-07	4.2
CE0493	2012-02-15	4.2
CE0493	2012-08-30	4.2
CE0494	2010-06-23	5.5
CE0494	2013-06-26	5.5
CE0495	2010-11-09	3.5
CE0495	2012-12-17	3.5
CE0495	2014-07-17	3.5
CE0496	2010-06-23	3.2
CE0496	2011-07-27	3.2
CE0496	2013-06-12	3.2
CE0499	2010-07-06	0
CE0499	2012-02-10	0
CE0500	2010-09-23	5.5
CE0500	2013-06-05	5.5
CE0500	2014-05-02	5.5
CE0502	2011-12-26	5
CE0502	2012-01-10	5
CE0502	2012-10-18	5
CE0502	2014-06-03	5
CE0506	2010-09-14	1.4
CE0506	2011-09-27	1.4
CE0507	2010-09-03	0
CE0508	2010-08-04	3.6
CE0508	2011-08-10	3.6
CE0508	2012-11-12	3.6
CE0509	2013-10-01	5
CE0510	2010-11-11	0
CE0511	2010-08-31	4
CE0512	2010-09-30	4.6
CE0513	2011-10-18	1.75
CE0514	2011-08-18	4
CE0515	2014-07-23	0
CE0516	2010-09-15	3
CE0516	2012-11-22	3
CE0517	2011-08-25	4
CE0517	2012-08-07	4
CE0517	2013-09-10	4
CE0517	2014-10-29	4
CE0518	2010-08-30	1
CE0519	2011-01-10	4
CE0519	2012-10-31	4
CE0519	2013-10-04	4
CE0519	2014-10-16	4
CE0521	2010-10-06	4.4
CE0521	2013-01-09	4.4
CE0521	2014-04-23	4.4
CE0522	2010-10-13	3.75
CE0522	2012-11-07	3.75
CE0522	2013-10-30	3.75
CE0523	2011-01-20	5
CE0523	2013-06-13	5
CE0523	2014-03-31	5
CE0525	2011-07-12	4
CE0525	2014-06-06	4
CE0528	2010-10-05	4
CE0528	2011-11-17	4
CE0528	2012-12-10	4
CE0528	2013-10-03	4
CE0529	2014-04-23	0
CE0530	2010-12-29	4.4
CE0530	2012-02-08	4.4
CE0530	2013-12-10	4.4
CE0532	2010-10-15	4
CE0532	2012-07-11	4
CE0532	2013-02-05	4
CE0532	2013-11-27	4
CE0533	2010-11-24	3.5
CE0533	2011-10-19	3.5
CE0533	2013-01-29	3.5
CE0534	2012-02-24	4.75
CE0534	2013-11-05	4.75
CE0534	2014-10-13	4.75
CE0535	2010-10-18	3.3
CE0535	2012-12-04	3.3
CE0535	2014-05-05	3.3
CE0536	2010-11-04	4.5
CE0536	2011-11-09	4.5
CE0536	2012-11-08	4.5
CE0536	2013-11-20	4.5
CE0537	2010-10-26	0
CE0538	2010-10-27	3.2
CE0539	2011-10-05	0
CE0544	2010-07-21	4.5
CE0544	2012-06-13	4.5
CE0544	2013-01-10	4.5
CE0545	2010-11-17	0
CE0546	2010-10-27	3.6
CE0546	2012-04-27	3.6
CE0546	2013-11-20	3.6
CE0547	2010-12-08	3.5
CE0547	2014-02-07	3.5
CE0548	2011-01-11	0.6
CE0551	2011-01-31	5
CE0551	2012-01-12	5
CE0551	2013-01-15	5
CE0551	2013-12-16	5
CE0552	2012-04-26	4
CE0552	2013-04-15	4
CE0553	2010-12-22	0
CE0554	2010-10-29	2
CE0554	2012-12-12	2
CE0556	2011-01-07	0
CE0556	2012-02-29	0
CE0557	2011-02-03	3.75
CE0560	2011-02-04	3.6
CE0560	2012-02-28	3.6
CE0561	2011-06-29	4.5
CE0561	2014-09-10	4.5
CE0564	2011-03-02	0.4
CE0564	2012-11-21	0.4
CE0565	2011-01-14	2.8
CE0565	2012-02-14	2.8
CE0565	2013-02-19	2.8
CE0565	2014-02-04	2.8
CE0567	2011-02-28	4
CE0567	2012-02-05	4
CE0567	2013-02-14	4
CE0567	2014-04-30	4
CE0570	2012-01-10	1.56
CE0571	2010-09-15	3.4
CE0571	2012-03-06	3.4
CE0571	2013-04-01	3.4
CE0572	2013-03-11	4
CE0573	2014-06-04	1.25
CE0574	2012-08-01	0
CE0575	2011-02-09	2.2
CE0575	2012-05-02	2.2
CE0575	2013-04-03	2.2
CE0576	2011-03-17	2.25
CE0578	2011-03-31	3.75
CE0578	2012-04-11	3.75
CE0578	2013-03-15	3.75
CE0578	2014-03-10	3.75
CE0579	2011-03-23	1.5
CE0579	2012-11-21	1.5
CE0580	2011-05-04	5.2
CE0580	2011-12-14	5.2
CE0580	2013-03-21	5.2
CE0580	2014-03-12	5.2
CE0581	2011-08-12	4
CE0581	2012-08-07	4
CE0581	2014-10-09	4
CE0582	2011-05-06	1.75
CE0582	2012-07-12	1.75
CE0585	2011-04-13	2.8
CE0585	2012-11-21	2.8
CE0585	2013-07-24	2.8
CE0587	2011-05-04	5
CE0587	2014-07-22	5
CE0588	2013-11-05	0
CE0589	2011-04-13	4
CE0589	2013-06-12	4
CE0589	2014-04-16	4
CE0591	2014-07-14	1
CE0592	2011-05-11	4
CE0592	2013-06-10	4
CE0593	2011-07-12	2.8
CE0593	2013-07-09	2.8
CE0594	2011-06-22	4.5
CE0594	2012-10-16	4.5
CE0594	2013-08-12	4.5
CE0594	2014-08-04	4.5
CE0595	2011-07-07	4
CE0595	2012-10-15	4
CE0595	2013-05-08	4
CE0596	2011-06-23	1.75
CE0596	2013-07-11	1.75
CE0597	2012-08-29	1.6
CE0598	2011-05-13	4.75
CE0598	2012-08-14	4.75
CE0598	2013-11-20	4.75
CE0598	2014-10-08	4.75
CE0599	2012-07-25	3.75
CE0599	2013-07-09	3.75
CE0599	2014-07-25	3.75
CE0601	2011-08-01	0
CE0602	2012-07-04	4.8
CE0602	2013-07-17	4.8
CE0602	2014-07-14	4.8
CE0603	2011-07-26	0
CE0604	2011-07-20	2.75
CE0604	2012-08-08	2.75
CE0605	2011-01-12	4.8
CE0605	2012-12-19	4.8
CE0605	2013-06-12	4.8
CE0607	2011-07-06	4.8
CE0607	2012-04-10	4.8
CE0607	2013-06-12	4.8
CE0608	2011-06-28	5
CE0608	2012-08-07	5
CE0608	2013-08-02	5
CE0609	2011-07-12	4.5
CE0609	2012-07-05	4.5
CE0609	2013-08-09	4.5
CE0609	2014-08-05	4.5
CE0610	2011-06-29	3.6
CE0610	2014-06-25	3.6
CE0612	2012-09-14	3.75
CE0612	2013-10-02	3.75
CE0612	2014-09-18	3.75
CE0613	2011-08-03	3.5
CE0614	2011-07-20	1.6
CE0615	2011-08-03	2.6
CE0615	2013-06-12	2.6
CE0616	2014-07-30	0
CE0618	2011-12-07	4
CE0618	2012-08-03	4
CE0618	2013-10-09	4
CE0618	2014-10-22	4
CE0619	2011-08-24	4.25
CE0619	2012-09-12	4.25
CE0619	2013-09-04	4.25
CE0619	2014-09-04	4.25
CE0621	2013-09-11	4.4
CE0621	2014-09-15	4.4
CE0622	2011-10-26	4
CE0623	2012-11-19	0
CE0623	2013-08-28	0
CE0624	2012-01-20	3.5
CE0625	2013-05-27	2.6
CE0625	2014-04-08	2.6
CE0626	2011-04-20	0
CE0627	2014-01-21	3.25
CE0629	2011-11-30	4.8
CE0631	2012-04-20	3.6
CE0632	2011-09-28	5.6
CE0632	2013-06-05	5.6
CE0632	2014-10-15	5.6
CE0633	2012-04-11	4
CE0633	2012-04-12	4
CE0634	2013-01-08	5.2
CE0634	2014-01-22	5.2
CE0635	2012-01-26	4.25
CE0635	2013-05-17	4.25
CE0635	2014-01-28	4.25
CE0636	2012-03-20	4.5
CE0636	2013-07-25	4.5
CE0638	2012-03-20	4
CE0638	2013-01-08	4
CE0638	2014-01-14	4
CE0639	2012-04-17	4.75
CE0640	2012-01-11	1.8
CE0640	2013-03-06	1.8
CE0642	2012-02-23	4
CE0642	2014-01-29	4
CE0645	2012-01-17	4.5
CE0645	2013-02-05	4.5
CE0645	2014-02-24	4.5
CE0646	2012-03-16	3.75
CE0646	2013-03-15	3.75
CE0646	2014-03-31	3.75
CE0647	2012-01-11	2.5
CE0647	2013-03-08	2.5
CE0648	2012-01-13	3.5
CE0648	2013-03-21	3.5
CE0648	2014-05-04	3.5
CE0650	2012-01-24	4
CE0652	2012-01-13	4
CE0652	2013-01-08	4
CE0653	2013-02-21	4
CE0656	2012-04-12	0.25
CE0659	2012-03-07	0.2
CE0659	2013-03-06	0.2
CE0661	2012-02-23	1.2
CE0661	2013-04-02	1.2
CE0662	2012-07-06	2.75
CE0662	2014-10-22	2.75
CE0664	2012-08-21	3.25
CE0665	2012-06-06	4.5
CE0665	2014-06-06	4.5
CE0666	2012-04-24	3.8
CE0667	2012-04-04	4.5
CE0667	2013-05-10	4.5
CE0667	2014-06-02	4.5
CE0668	2012-05-09	0
CE0669	2012-07-17	1
CE0669	2013-05-06	1
CE0670	2012-04-04	5.75
CE0670	2013-06-05	5.75
CE0670	2014-08-06	5.75
CE0671	2012-05-09	0
CE0672	2012-04-27	0.8
CE0673	2012-09-20	5
CE0673	2014-10-08	5
CE0676	2012-10-04	4.4
CE0676	2014-11-27	4.4
CE0677	2012-06-22	5
CE0677	2013-06-25	5
CE0678	2012-07-20	1
CE0678	2013-09-09	1
CE0678	2014-08-06	1
CE0679	2012-07-03	5
CE0679	2014-08-22	5
CE0681	2012-08-03	0
CE0682	2012-08-07	4
CE0682	2013-06-13	4
CE0682	2014-10-08	4
CE0684	2012-07-29	1.4
CE0686	2012-10-04	0
CE0687	2012-09-25	3.25
CE0687	2013-10-01	3.25
CE0687	2014-10-07	3.25
CE0688	2012-10-04	4

## Sheet: CODE BOOK
UMDT DATA
variables		categories codes
ID	patient identification
SEX	sex	M - male	F -female
DOB	date of birth
AGE	age	in years
TreatGroup	treatment group	1=UMDT	0=RMDT
INICIAL aBI	initial baciloscopic index	mean of 6 sites
DT FIRST VISIT	date first visit
DT LAST VISIT	date last visit
DISABILITY PROG	disability progression	1 - Yes	0 - No
DT DisProg	date of disability progression
REACTION	reaction	1 - Yes	0 - No
DT FIRST REACTION	date first reaction
No.Reactions AFTER 6 m	number of rection after 6 months	number
RELAPSE	relapse	1 - Yes	0 - No
RELAPSE DATE	date of relapse
baciloscopic examinations	examinations after 6 months
ID	patient identification
DT SSS examination	date of slit skin smear colection
BI result	baciloscopic index result	mean of 6 sites
